# 1 **Oxytocin neurons mediates the effect of social isolation via the** 2 **VTA circuits**

3

4 Stefano Musardo<sup>1</sup>, Alessandro Contestabile<sup>1</sup>, Jerome Mairesse<sup>2</sup>, Olivier Baud<sup>2, 3</sup> and Camilla  
5 Bellone<sup>1,#</sup>

6 <sup>1</sup> University of Geneva, Department of Basic Neuroscience, 1 rue Michel-Servet, 1211 Geneva,  
7 Switzerland.

8 <sup>2</sup> Laboratory of Child Growth and Development, University of Geneva, Geneva, Switzerland

9 <sup>3</sup> Division of Neonatology and Pediatric Intensive Care, Children's University Hospital of  
10 Geneva, Geneva, Switzerland.

11 # Corresponding author email: [camilla.bellone@unige.ch](mailto:camilla.bellone@unige.ch)

12 **Keywords:** adolescence social isolation. VTA dopamine neurons, oxytocin, GluA2-lacking  
13 AMPA receptors

14

## 15 **Abstract**

16

17 Social interaction during adolescence strongly influences brain function and behaviour, and the  
18 recent pandemic has emphasized the devastating effect of social distancing on mental health.

19 While accumulating evidences have shown the importance of the reward system in encoding  
20 specific aspects of social interaction, the consequences of social isolation on the reward system

21 and the development of social skills later in adulthood are still largely unknown. Here, we  
22 found that one week of social isolation during adolescence in mice increased social interaction

23 at the expense of social habituation and social novelty preference. Behavioural changes were  
24 accompanied by the acute hyperexcitability of dopamine (DA) neurons in the ventral segmental

25 area (VTA) and long-lasting expression of GluA2-lacking AMPARs at excitatory inputs onto  
26 DA neurons that project to the prefrontal cortex (PFC). Social isolation-dependent behavioural

27 deficits and changes in neural activity and synaptic plasticity were reversed by chemogenetic  
28 inhibition of oxytocin neurons in the paraventricular nucleus (PVN) of the hypothalamus.

29 These results demonstrate that social isolation has acute and long-lasting effects on social  
30 interaction and suggest that these effects are mediated by homeostatic adaptations within the

31 reward circuit.

32

## 1 **Introduction**

2

3 The experience of social interaction during postnatal development and adolescence is  
4 fundamental for setting the basis for social life, and the deprivation of social experience (hereby  
5 defined social isolation) impacts the survival of all species, as suggested by the adverse effects  
6 of the massive social isolation imposed by the COVID-19 crisis on mental health <sup>1</sup>. Identifying  
7 the possible neural mechanisms that underly the negative consequences of social isolation may  
8 help to prevent and treat mental disorders.

9 In rodents, depending on the duration of juvenile social isolation, increased or decreased  
10 sociability in adulthood has been reported, suggesting that adolescence is a sensitive period for  
11 the establishment of social behaviour later in life <sup>2-4</sup>. Few studies have examined the acute  
12 effects of social isolation and the cellular and circuit mechanisms that regulate the long-lasting  
13 effects of social isolation. For example, short-term isolation has been shown to increase social  
14 interaction in rats<sup>5,6</sup>.

15 Social interaction is a rewarding experience with reinforcing properties, and recent studies have  
16 highlighted the necessity and sufficiency of dopamine (DA) neurons of the ventral segmental  
17 area (VTA) to promote social interaction <sup>7,8</sup>. Brief periods of acute social isolation have been  
18 reported to activate midbrain regions in humans <sup>9</sup> and to increase the activity of DA neurons  
19 within the dorsal Raphe nucleus (DRN)<sup>10</sup>. Intriguingly, while in rodents, 24 hr of social  
20 isolation does not change synaptic strength onto DA neurons of the VTA <sup>10</sup>, in humans, the  
21 response of the VTA to social cues after brief isolation is increased <sup>9</sup>. These data suggest that  
22 changes within DA neurons in the VTA may be the substrate for social craving caused by acute  
23 social isolation. The neuronal mechanisms and long-term consequences remain uninvestigated.  
24 DA neurons of the VTA contribute to reward-seeking behaviour, motivation and reinforcement  
25 learning, and their activity is controlled upstream by several brain structures <sup>9</sup>, each of which  
26 may contribute to distinct behavioural aspects. Interestingly, DA neuron activity is not only  
27 under the control of glutamatergic and GABAergic inputs but also tightly regulated by  
28 neuromodulators that act on G protein-coupled receptors (GPCRs). Oxytocin is a neuropeptide  
29 released by neurons within the paraventricular nucleus (PVN) of the hypothalamus that directly  
30 projects to the VTA. Oxytocin in the VTA activates oxytocin receptors on DA neurons,  
31 regulates their activity <sup>11-13</sup> and favours social reward. Indeed, the presence of a conspecific  
32 activates the oxytocin system, which increases oxytocin release, activates DA neurons of the  
33 VTA and therefore promotes the initiation and maintenance of social interaction <sup>14,15</sup>.  
34 Interestingly, although it has been hypothesized that oxytocin senses changes in the

1 environment and facilitates behavioural stability to better adapt to changes <sup>16</sup>, the role of  
2 oxytocin neurons in the behavioural consequences of social isolation remains largely unknown.

3

#### 4 **Results**

5

6 We first characterized the acute consequences of short-term social isolation on social  
7 interaction during adolescence. Male mice were weaned at post-natal day (P) 21 and then  
8 isolated between P28 and P35 (Figure 1A). The last day, we exposed the experimental mice to  
9 an unknown sex-matched juvenile conspecific or a novel object in a direct free-interaction task  
10 (Figure 1B). Isolated mice spent more time interacting with the conspecific than the grouped  
11 control mice (Figure 1C). Conversely, object exploration did not differ between the two groups,  
12 indicating that social isolation preferentially affects social exploration (Figure 1B, D).  
13 Increased social interaction was not observed after a brief 24-hr period of social isolation, as  
14 expected from previous work <sup>17</sup> (Figure 1 – supplement 1A, B), suggesting the important role  
15 of duration in the behavioural consequences of social isolation.

16 To further investigate the consequences of social isolation on different aspects of social  
17 behaviour, we used a three-chamber interaction task to characterize sociability and social  
18 novelty preference (Figure 1E). We found that both the socially isolated and grouped mice  
19 spent significantly more time investigating a juvenile conspecific over a novel object (Figure  
20 1F, Figure 1 – supplement 1 C-E). In the second part of the test, in contrast to the control mice,  
21 the socially isolated mice spent the same amount of time interacting with familiar and unknown  
22 conspecifics (Figure 1G, Figure 1 – supplement 1 C,F,G), indicating that social isolation  
23 induces deficits in social novelty preference. Interestingly, after social isolation, mice presented  
24 deficits in habituation (Figure 1H) when repeatedly exposed to the same juvenile conspecific  
25 for 4 consecutive days (Figure 1I, J). Novel object recognition (Figure 1 – supplement 2 A-F)  
26 and behaviour in the elevated plus maze (Figure 1 – supplement 2 G-K) did not differ between  
27 the socially isolated and control mice. To investigate whether social isolation-dependent  
28 behavioural deficits are age dependent, we investigated isolated mice during adulthood (7 days  
29 of isolation; P53-P60, Figure 1 – supplement 3A). We found that isolated adult mice spent less  
30 time interacting with a conspecific than the control mice, while object exploration (Figure 1 –  
31 supplement 3B-D), sociability, and social novelty preference (Figure 1 – supplement 3E-L)  
32 were no different.

33 Altogether, these data indicate that adolescence is a critical period for the development of social  
34 behavioural skills and that social isolation during this period increases social interaction at the

1 expense of an impaired social novelty preference and altered habituation to interact with a  
2 familiar conspecific.

3 In humans, acute social isolation has been reported to have a rebound effect on conspecific  
4 interaction, accompanied by an increase in the response of reward circuits and, in particular,  
5 the VTA in response to social cues <sup>9</sup>. In line with these discoveries and to further investigate  
6 the related neural mechanisms, we measured the excitability of DA neurons in the VTA after  
7 social isolation.

8 Mice were isolated or maintained in group housing from P28 to P35, and acute brain slices  
9 were subsequently prepared. (Figure 2A). We first performed whole-cell patch clamp recording  
10 to measure the excitability of putative DA neurons in the VTA. We observed an increase in  
11 excitability after social isolation without a change in the resting membrane potential (Figure  
12 2B, D). Aiming to identify the key upstream brain regions responsible for regulating the  
13 activity of DA neurons, we performed cFos analysis of brain slices 7 days after social isolation  
14 and observed an increase in PVN neurons immunopositive for cFos, suggesting increased  
15 activity (Figure 3A, B). Since PVN neurons have been shown to regulate the activity of DA  
16 neurons in the VTA, we tested the hypothesis that these neurons are the master regulator of DA  
17 neuron activity during social isolation. To test our hypothesis, mice were first injected with  
18 CTB-488 in the VTA on P21 and then isolated between P28 and P35, after which PVN brain  
19 slices were prepared. PVN neurons projecting to the VTA (PVN—VTA) showed increased  
20 excitability compared to that of the control group when recorded *ex vivo* via the whole-cell  
21 patch clamp technique (Figure 3C-E).

22 Because of their role in social behaviour and the regulation of DA neuron activity <sup>11,18</sup>, we then  
23 focused our analysis on oxytocin neurons within the PVN. By confocal imaging quantification,  
24 we observed an increase in oxytocin neuron density in the PVN after social isolation (Figure  
25 3F, G), suggesting that the increase in oxytocin signalling during isolation can promote DA  
26 neuron hyperexcitability and lead to increased social interaction. To prove the causal link  
27 between oxytocin neurons and DA neuron activity during social isolation, we crossed OXT-  
28 Cre mice with hM4Di-loxP mice (OXT-Cre:hM4Di-loxP) to express a designer inhibitor  
29 receptor activated exclusively by designer drugs expressed under the Cre promoter in OXT-  
30 positive cells (Figure 3H). Clozapine-N-oxide was dissolved in drinking water and  
31 administered during social isolation (or in parallel to grouped control mice). We obtained  
32 whole-cell patch clamp recordings from putative DA neurons in the VTA and observed the  
33 rescue of excitability in cells recorded from isolated mice treated with CNO but not isolated  
34 mice treated with vehicle (Figure 3I-M, Figure 3 – supplement 1). Finally, to prove causality

1 between neuronal hyperexcitability and behaviour, we treated OXT-Cre:hM4Di-loxP mice  
2 with CNO or vehicle and compared the time spent in interaction with a novel conspecific after  
3 social isolation (Figure 3N). We also used grouped mice treated with CNO or vehicle as  
4 controls. As expected, we found an increase in interaction time in isolated versus grouped mice,  
5 while no difference was observed between mice treated with CNO independent of housing  
6 (Figure 3O). Altogether, the data presented here indicate that increased social interaction after  
7 social isolation is the consequence of the increased excitability of oxytocin neurons of the PVN  
8 and suggest that this effect is mediated by the increased activity of DA neurons within the  
9 VTA.

10 We next investigated whether social isolation during adolescence has long-lasting  
11 consequences and the consequent neural mechanisms. After 7 days of social isolation from P28  
12 to P35, the mice were regrouped, and social behaviour was then tested during adulthood (Figure  
13 4A). We still observed an increase in social interaction in mice isolated during adolescence  
14 compared to the control group (Figure 4B, C), but object exploration was not affected (Figure  
15 4D). Sociability, social novelty preference (Figure 4 – supplement 1A-H) and social  
16 habituation were similar between grouped and regrouped mice (Figure 4E, G), although during  
17 the first interaction, regrouped mice interacted more (Figure 4F). These behavioural data  
18 indicate that acute social isolation during adolescence leads to a long-lasting increase in social  
19 interaction during adulthood. Remarkably, inhibition of oxytocin neuron activity during social  
20 isolation was sufficient to block the long-lasting consequences of social isolation and restore  
21 social behaviour (Figure 4H-I). These data not only indicate that an isolation-dependent  
22 increase in social interaction occur during adulthood but also support the role of oxytocin  
23 neurons in regulating social craving after isolation.

24 To investigate the related neural mechanisms underlying the long-lasting consequence of social  
25 isolation, we performed whole-cell patch clamp recording of putative DA neurons in the VTA.  
26 Intriguingly, neuronal excitability in adulthood did not differ between isolated and control mice  
27 (Figure 4 – supplement 1I-N), suggesting that the long-lasting behavioural consequences of  
28 social isolation, although induced by neuronal excitability, are exerted by a different neuronal  
29 mechanism. Neurons undergo different mechanisms of homeostatic adaptation to overall  
30 changes in neuronal activity, and many studies have reported *in vivo* scaling triggered by  
31 sensory manipulation and exerted by the regulation of calcium-permeable (CP)-AMPA<sup>19</sup>.  
32 We therefore characterized whether a long-lasting increase in social interaction after social  
33 isolation during adolescence is accompanied by changes at the level of synaptic transmission  
34 at excitatory inputs onto DA neurons in the VTA. We obtained whole-cell patch clamp

1 recordings from putative DA neurons while pharmacologically isolating excitatory  
2 transmission. Considering the output-dependent heterogeneity of DA neurons and the  
3 previously identified neuronal type specificity in the form of experience-dependent synaptic  
4 plasticity<sup>20,21</sup>, we decided to characterize long-lasting, isolation-dependent effects on the  
5 synaptic plasticity of DA neurons in the VTA in an output-specific manner. To that end, we  
6 injected cholera toxin in the prefrontal cortex (PFC) or nucleus accumbens (NAc) and then  
7 obtained whole-cell patch clamp recordings from the identified neuronal population (Figure 5A,  
8 F). While we observed no difference in the ratio of AMPAR- and NMDAR-mediated currents  
9 between control and isolated mice (Figure 5B, C), we observed an increase in rectification  
10 index (RI) at excitatory inputs onto DA neurons projecting to the PFC in isolated mice (Figure  
11 5D, E). No change in the AMPA/NMDA ratio or the RI was observed at excitatory inputs onto  
12 DA neurons projecting to the NAc (Figure 5G-J). We then tested whether the expression of  
13 CP-AMPA receptors on DA neurons projecting to the PFC is the consequence of the increased  
14 excitability of oxytocin neurons in the PVN during social isolation. We isolated OXT-  
15 Cre:hm4Di-loxP mice during adolescence, treated them with CNO or vehicle during isolation,  
16 regrouped them after 7 days until adulthood and recorded excitatory transmission from DA  
17 neurons projecting to the PFC from acute VTA slices (Figure 5K). Notably, we observed that  
18 RI was normalized when the activity of the oxytocin neurons was chemogenetically reduced  
19 during social isolation (Figure 5L, M). These data indicate that social isolation during  
20 adolescence leads to long-lasting effects on social interaction that are accompanied by oxytocin  
21 neuron-dependent changes in synaptic transmission at excitatory inputs onto DA neurons  
22 projecting to the PFC.

23 Finally, to assess the causal link between the presence of CP-AMPA receptors and isolation-dependent  
24 changes in social interaction, the VTA in each mouse was cannulated, and we injected a CP-  
25 AMPA receptor antagonist (NASPM) into the region 10 min prior to the direct interaction task (Figure  
26 6A, B). While NASPM did not affect the interaction time in control mice, the inhibition of CP-  
27 AMPA receptors in the VTA was sufficient to normalize social interaction in the regrouped mice  
28 (Figure 6C). The data presented here show that the increased activity of oxytocin neurons  
29 during social interaction induces synaptic scaling exerted by the presence of CP-AMPA receptors and  
30 that these receptors are responsible for increased social interaction during adulthood.



## 1 **Discussion**

2

3 Social isolation is an adverse experience across social species that has long-lasting behavioural  
4 and physiological consequences <sup>22</sup>. Although anxiety, depression and obsessive-compulsive  
5 behaviour generally emerge after prolonged social isolation, it is evident that a short period of  
6 deprivation from conspecific interaction may also trigger aversive consequences. The negative  
7 effects of social isolation are particularly evident for adolescents. Indeed, adolescence is a  
8 critical period for not only social interaction but also the emergence of psychiatric diseases,  
9 and social isolation during adolescence can exacerbate mental health problems. Why is  
10 adolescence especially affected, and what are the circuit mechanisms underlying the negative  
11 consequences of social isolation?

12 Social interaction is a basic need across species, and rodents are excellent models in which to  
13 investigate the neural bases of social interaction and social isolation. During adolescence, the  
14 development of social and cognitive skills indeed depends on peer-to-peer interactions <sup>23,24</sup>,  
15 and acute social isolation in rodents is sufficient to cause behavioural abnormalities, including  
16 increased vulnerability to drug addiction and depressive-like behaviour, later in life. Here, we  
17 show that one week of social isolation during adolescence is sufficient to generate a rebound  
18 increase in social interaction in male mice independent of whether the conspecific is novel or  
19 familiar. Indeed, the increase in interaction is accompanied by deficits in social novelty  
20 preference and social habituation. These data support the assumption that social interaction is  
21 a need and that the absence of social cues generates a craving response similar to that generated  
22 by food cues after fasting <sup>9</sup>. Indeed, we could speculate that social isolation during adolescence  
23 results in an intense urge to interact with whatever conspecific is present.

24 Previous studies have indicated the role of DA neurons in the VTA in social behaviour <sup>7,25,26</sup>  
25 and shown that chronic isolation alters DA levels in the NAc <sup>27</sup>. Remarkably, acute social  
26 isolation during adulthood changes the synaptic strength at excitatory inputs onto DA neurons  
27 of the DRN in rodents, leaving synaptic transmission onto DA neurons of the VTA unaltered  
28 <sup>17</sup> Interestingly, human exposure to a social cues after acute isolation evokes activity in the  
29 VTA <sup>9</sup>, suggesting that while the loneliness-like brain state induced by social isolation is  
30 mediated by DA neurons within the DRN, DA neurons in the VTA mediate social craving. Our  
31 data indicate that one week of isolation during adolescence is sufficient to increase the overall  
32 excitability of neurons within the mesocorticolimbic system. We next investigated the  
33 underlying mechanisms and found that the activity of oxytocin neurons within the PVN is  
34 causally linked to neuronal excitability within the reward system and to the behavioural

1 consequences of social isolation. Previously, the release of oxytocin in the VTA was shown to  
2 increase DA neuron firing within the VTA <sup>18</sup>. Furthermore, restoration of oxytocin signalling  
3 in the VTA in an autism spectrum disorder (ASD)-related mouse model was sufficient to rescue  
4 social novelty responses <sup>28</sup>. Taken together, these data suggest that oxytocin neurons represent  
5 the neural signature of social craving.

6 We next chose to investigate whether acute social isolation during adolescence has long-lasting  
7 consequences. Isolated mice spent more time interacting with a conspecific than control mice  
8 did one month after being regrouped, indicating that the rebound increase in social interaction  
9 is a long-lasting effect of isolation. Recently, it was reported that two weeks of social isolation  
10 after weaning altered the pathway from the medial PFC to the posterior paraventricular  
11 thalamus, leading to decreased sociability in adult mice <sup>2</sup>. Although the differences at the  
12 behavioural level between the two studies can be explained by the duration of social isolation,  
13 together, these data show that adolescence is a critical period for the establishment of social  
14 behaviour and that isolation during this period alters sociability during adulthood.

15 Increased social interaction during adulthood is accompanied and causally linked to the  
16 increase in GluA2-lacking AMPARs at excitatory inputs onto DA neurons projecting to the  
17 PFC. GluA2-lacking AMPARs are calcium permeable (CP) ionotropic receptors with larger  
18 single-channel conductance and that can undergo voltage-dependent blockade by polyamines  
19 <sup>29,30</sup>. These receptors are inserted at excitatory synapses after exposure to addictive drugs <sup>31</sup> and  
20 have been proposed to mediate the incubation of drug craving <sup>32</sup>. Interestingly, it has also been  
21 shown that stress induces the insertion of these receptors, and local blockade of GluA2-lacking  
22 AMPARs was shown to attenuate stress-induced behavioural changes in rodents <sup>33,34</sup>.  
23 Furthermore, the presence of these receptors changes the rules for the induction of plasticity <sup>35</sup>  
24 and mediates *in vivo* synaptic scaling <sup>36</sup>. Interestingly, we show here that prolonged activation  
25 of DA neurons induced by social isolation promoted the insertion of CP-AMPA receptors and that *in*  
26 *vivo* blockade of these receptors was sufficient to rescue social isolation-induced behavioural  
27 deficits. Together, all these findings indicate that GluA2-lacking AMPARs are important  
28 therapeutic targets for the treatment of maladaptive motivated behaviour and suggest that  
29 inhibitors of these receptors may counteract the negative consequences of social isolation.

30 By investigating the short-term and long-term consequences of social isolation during  
31 adolescence, our work here contributes to our understanding of how social isolation impacts  
32 neural circuits and behaviour. Since social isolation has a tremendous impact on mental health  
33 and increases vulnerability to psychiatric diseases, our work is relevant to the identification of  
34 new therapeutic approaches to fight loneliness and social craving.



## 1 **Material and methods**

2

### 3 **Animals and experimental paradigms**

4 The study was conducted with male wild-type (WT) and OXT-hM4Di mice, under 12h light-  
5 dark cycle (7 a.m. – 7 p.m.) with free access to food and drink. For adolescence social  
6 isolation, mice were weaned at P21 and kept in groups until P28. Subsequently mice were  
7 single housed until P35. For 24h isolation mice were single housed between P34 and P35. For  
8 social isolation in adulthood, mice were kept in groups until P53 and then were single housed  
9 until P60. For the long-lasting effect of SI, mice were single housed between P28 and P35  
10 and subsequently regrouped until P60. When in group, mice were housed 2 by 2. The  
11 experimental mice were randomly assigned to the different groups. All the procedures  
12 performed at UNIGE complied with the Swiss National Institutional Guidelines on Animal  
13 Experimentation and were approved by the Swiss Cantonal Veterinary Office Committees for  
14 Animal Experimentation.

15

### 16 **Direct free interaction task**

17 Mice were let to freely explore for 10 minutes the arena (clean home-cage) and  
18 subsequently an unfamiliar sex-matched conspecific social stimulus (1 week younger) or an  
19 object was introduced and the interaction time was recorded for 5 minutes. All the trials were  
20 recorded with a camera placed above the arena, and the interaction time was manually scored  
21 when the experimental mouse initiated the action and when the nose of the animal was  
22 oriented toward the social stimulus mouse only, or towards the object.

23

### 24 **Three-chamber task**

25 A three-chambered social interaction assay was used, comprising a rectangular Plexiglas  
26 arena (60 × 40 × 22 cm) (Ugo Basile, Varese, Italy) divided into three chambers (each 20 ×  
27 40 × 22 (h) cm). Each mouse was placed in the arena for a habituation period of 10 min, when  
28 it was allowed to freely explore the empty arena. At the end of the habituation, two enclosures  
29 with metal vertical bars were placed in the center of the two outer chambers. One enclosure  
30 was empty (serving as an object) whereas the other contained a social stimulus (stimulus1, 1  
31 week younger unfamiliar sex-matched conspecific). The experimental mouse was allowed to  
32 freely explore the apparatus and the enclosures for 10 min (social preference phase).  
33 Subsequently, the empty enclosure was replaced with another contained an unfamiliar  
34 conspecific social stimulus (stimulus2) and the experimental mouse was allowed to freely

1 explore for 10 min the apparatus and the enclosures for other 10 min (social novelty phase).  
2 The position of the empty vs. social stimulus1-containing or social stimulus1-containing vs  
3 social stimulus2-containing enclosures alternated and was counterbalanced for each trial to  
4 avoid any bias effects. Every session was video-tracked and recorded using ANY-maze  
5 (Stoelting Europe, Dublin, Ireland) which provided an automated recording of the time in the  
6 compartment and the distance moved. The time spent interacting with each enclosure was  
7 manually scored and then used to determine the preference index for the object or social target  
8 (stimulus1 and stimulus2). The stimulus interaction was scored when the nose of the  
9 experimental was oriented toward the enclosures at a distance approximately less than 2 cm.  
10 The arena was cleaned with 1% acetic acid solution and dried between trials.

### 11 **Habituation task**

12 A clean homecage was used as arena. The experimental mouse was placed in the arena with  
13 a novel social stimulus (sex-matched conspecific mouse, 1-week younger compare to the  
14 experimental mouse). The animals were let free to explore the cage and to interact with each  
15 other for 15 minutes. At the end of the trial, the experimental and stimulus mice were returned  
16 to their home-cagehomecage. For 4 consecutive days the experimental mouse was exposed to  
17 the same social stimulus. All the trial were recorded with a camera placed above the arena.  
18 Non-aggressive behavior was manually scored when the experimental mouse initiated the  
19 action and when the nose of the animal was oriented toward the social stimulus mouse only.  
20

### 21 **Novel Object Recognition (NORT)**

22 A squared arena was used for the task which consists of three phases: a first habituation phase  
23 followed by a familiarization and the actual test phase. During the habituation phase the  
24 experimental mouse is let to freely explore the arena (40x40x40 cm) for 10 min. During the  
25 familiarization phase, the animal was exposed to two identical objects (object 1 – object 2)  
26 and was let to freely interact for 10 minutes with both. After a retention delay of 20 min, the  
27 mice were exposed for 10 minutes to one of the familiar objects (object 1) while the other was  
28 replaced with a novel object (object 3). During the different phases of the test, the objects  
29 were placed in the opposite sides of the cage, alternating the position of the respective objects.  
30 Every session was video-tracked and recorded using ANY-maze (Stoelting Europe, Dublin,  
31 Ireland). The time spent interacting with each object was manually scored and then used to  
32 determine the preference index for the different objects. The stimulus interaction was scored

1 when the nose of the experimental was oriented toward the objects at a distance approximately  
2 less than 2 cm. The arena was cleaned with 1% acetic acid solution and dried between trials.

### 3 **Elevated Plus Maze (EPM)**

4 The elevated plus maze consisted of a platform of four opposite arms (40 cm), two of them  
5 are open and the other two are closed (enclosed by 15 cm high walls). The apparatus was  
6 elevated at 55 cm from the floor. Each male adult mouse was placed individually in the center  
7 of the elevated plus maze apparatus with the snout facing one of the open arms and was filmed  
8 for 5 min. Distance moved (cm) and time spent in the open and closed arms (s) of the arena  
9 were measured with ANY-maze (Stoelting Europe, Dublin, Ireland). Between each session,  
10 the apparatus was cleaned with 1% acetic acid solution and dried between trials.

11

### 12 **Whole-cell patch clamp recordings**

13 Horizontal midbrain slices 200  $\mu\text{m}$  thick containing the VTA or coronal midbrain slices 250  
14  $\mu\text{m}$  thick containing PVN were prepared. Brains were sliced by using a cutting solution  
15 containing: 90.89 mM choline chloride, 24.98 mM glucose, 25 mM  $\text{NaHCO}_3$ , 6.98 mM  
16  $\text{MgCl}_2$ , 11.85 mM ascorbic acid, 3.09 mM sodium pyruvate, 2.49 mM KCl, 1.25 mM  
17  $\text{NaH}_2\text{PO}_4$  and 0.50 mM  $\text{CaCl}_2$ . Brain slices were incubated in cutting solution for 20-30  
18 minutes at 35°. Subsequently, slices were transferred in artificial cerebrospinal fluid (aCSF)  
19 containing: 119 mM NaCl, 2.5 mM KCl, 1.3 mM  $\text{MgCl}_2$ , 2.5 mM  $\text{CaCl}_2$ , 1.0 mM  $\text{NaH}_2\text{PO}_4$ ,  
20 26.2 mM  $\text{NaHCO}_3$  and 11 mM glucose, bubbled with 95%  $\text{O}_2$  and 5%  $\text{CO}_2$ ) at room  
21 temperature. Whole-cell voltage clamp or current clamp electrophysiological recordings were  
22 conducted at 35°–37° in aCSF (2–3 ml/min, submerged slices). Recording pipette contained  
23 the following internal solution: 140 mM K-Gluconate, 2 mM  $\text{MgCl}_2$ , 5 mM KCl, 0.2 mM  
24 EGTA, 10 mM HEPES, 4 mM  $\text{Na}_2\text{ATP}$ , 0.3 mM  $\text{Na}_3\text{GTP}$  and 10 mM creatine-phosphate.  
25 The cells were recorded at the access resistance from 10–30  $\text{M}\Omega$ . Resting membrane potential  
26 (in mV) was read using the Multiclamp 700B Commander (Molecular Devices) while  
27 injecting no current ( $I = 0$ ) immediately after breaking into a cell. Action potentials (AP) were  
28 elicited in current clamp configuration by injecting depolarizing current steps (50 pA, 500  
29 ms) from 0 to 400 pA, in presence.

30 For VTA excitability, putative DA neurons were identified accordingly to their position  
31 (medially to the medial terminal nucleus of the accessory optic tract), morphology and cell  
32 capacitance ( $>28$  pF). For CNO validation (20 $\mu\text{M}$ ), the drug was applied in the recording  
33 chamber before to start the excitability protocol. Excitatory post-synaptic currents (EPSCs)  
34 were recorded in voltage-clamp configuration, elicited by placing a bipolar electrode rostro-

1 laterally to VTA at 0.1 Hz and isolated by application of the GABA<sub>A</sub>R antagonist picrotoxin  
2 (100  $\mu$ M). Recording pipette contained the following internal solution: 130 mM CsCl, 4 mM  
3 NaCl, 2 mM MgCl<sub>2</sub>, 1.1 mM EGTA, 5 mM HEPES, 2 mM Na<sub>2</sub>ATP, 5 mM sodium creatine  
4 phosphate, 0.6 mM Na<sub>3</sub>GTP, 0.1 mM spermine and 5 mM lidocaine N-ethyl bromide. Access  
5 resistance (10 – 30 M $\Omega$ ) was monitored by a hyperpolarizing step of -4 mV at each sweep,  
6 every 10 s. Data were excluded when the resistance changed > 20%. The AMPA/NMDA was  
7 calculated by subtracting to the mixed EPSC (+40 mV), the non-NMDA component isolated  
8 by D-APV (50  $\mu$ M at +40 mV) bath application. The values of the ratio may be  
9 underestimated since it was calculated with spermine in the pipette. The rectification index  
10 (RI) of AMPARs is the ratio of the chord conductance calculated at negative potential (-60  
11 mV) divided by the chord conductance at positive potential (+40 mV). The synaptic responses  
12 were collected with a Multiclamp 700B-amplifier (Axon Instruments, Foster City, CA),  
13 filtered at 2.2 kHz, digitized at 5 Hz, and analyzed online using Igor Pro software  
14 (Wavemetrics, Lake Oswego, OR).

## 15 **Surgeries**

16 Injections of Cholera-toxin subunit B (CTB)-Alexa Fluor 488 or 555 conjugated were  
17 performed in WT and OXT-hM4Di mice at P24 or P45-50. Mice were anesthetized with a  
18 mixture of oxygen (1L/min) and isoflurane 3% (Baxter AG, Vienna, Austria) and placed in a  
19 stereotactic frame (Angle One; Leica, Germany). The skin was shaved, locally anesthetized  
20 with 40 – 50  $\mu$ L lidocaine 0.5% and disinfected. Unilateral or bilateral craniotomy (1 mm in  
21 diameter) was then performed at following stereotaxic coordinates: NAc ML  $\pm$ 0.85 mm, AP  
22 +1.3 mm, DV -4.5 mm from Bregma; mPFC (4 injection site) position 1 ML  $\pm$ 0.27 mm, AP  
23 +1.5 mm, DV -3,-2.5 mm, position 2 ML  $\pm$ 0.27 mm, AP +1.75 mm, DV -3,-2.5 mm, position  
24 3 ML  $\pm$ 0.27 mm, AP +2 mm, DV -2.6,-2.2 mm, position 4 ML  $\pm$ 0.27 mm, AP +2.25 mm, DV  
25 -2 mm from Bregma; VTA AP -3 , ML  $\pm$ 0.5, DV -4.3 from bregma. The CTB was injected via  
26 a glass micropipette (Drummond Scientific Company, Broomall, PA) either into the NAc,  
27 mPFC and VTA at the rate of 100 nl/min for a total volume of 200 nL in each side. For NASPM  
28 experiments, unilateral implantations of stainless steel 26-gauge cannula (PlasticsOne,  
29 Virginia, USA) were performed on WT mice at P54. Mice were anesthetized and placed in a  
30 stereotactic frame as previously described. Unilateral craniotomy (1 mm in diameter) was then  
31 performed over the VTA at following stereotactic coordinates: ML:  $\pm$ 0.9 mm, AP: -3.2 mm,  
32 DV: -3.95 mm from Bregma. The cannula was implanted with a 10° angle, placed above the

1 VTA and fixed on the skull with dental acrylic. The cannula was protected by a removable cap.  
2 All animals underwent behavioral experiments 1 – 2 weeks after surgery.

3

#### 4 **Pharmacological treatments**

5 Isolated or grouped mice were treated for 1 week with Clozapine N-oxide (CNO, Enzo Life  
6 Science, Farmingdale, USA). CNO was dissolved in the drinking water at 5mg/200mL in 4%  
7 sucrose and 0.2% saccharine solution. Mice received either CNO solution or sugar solution  
8 only as control. The solutions were prepared fresh daily. For the acute effects of SI, after 1  
9 week of treatment mice underwent to direct free interaction task or were used for whole-cell  
10 patch clamp recordings. For long-lasting effect of SI, CNO treatment was stopped at P35, mice  
11 were regrouped until P60 and normal water was given. Mice underwent to direct free  
12 interaction task or were used for whole-cell patch clamp recordings. For the experiments with  
13 1-Naphthylacetyl spermine trihydrochloride (NASPM), mice were infused using a Minipump  
14 injector (pump Elite 11, Harvard apparatus, US). 10 minutes before each trial mice were either  
15 infused with 4 µg of NASPM dissolved in 500 nL of aCSF (2 minutes of active injection at  
16 250 nL/min rate, and 1 minute at rest) or aCSF only (vehicle). After infusion mice underwent  
17 to to direct free interaction task.

18

#### 19 **Immunohistochemistry and images acquisition**

20 PVN slices were washed three times with phosphate buffered saline (PBS) 0.1M. Slices were  
21 then pre-incubated with PBS-BSA-TX buffer (0.5% BSA and 0.3% Triton X-100) for 90  
22 minutes at room temperature in the dark. Subsequently, cells were incubated with primary  
23 antibody (Oxytocin, 1/10000 dilution, Immunostar #20068, or cFOS 1/5000 dilution,  
24 Synaptic Systems #226008) diluted in PBS-BSA-TX (0.5% BSA and 0.3% Triton X-100)  
25 overnight at 4°C in the dark. The following day slices were washed three times with PBS  
26 0.1M and incubated for 90 minutes at room temperature in the dark with the secondary  
27 antibody (1/500 dilution, donkey anti-rabbit 488 (Alexa Fluor, Abcam ab150073)), diluted in  
28 PBS-BSA buffer (0.5% BSA). Finally, coverslips were mounted using fluoroshield mounting  
29 medium with DAPI (Abcam, ab104139). Tissue images of PVN were acquired using a  
30 confocal laser-scanning microscope LSM700 (Zeiss) and the number of Oxytocin or cFOS  
31 positive cells were counted for each slice.

32

33

34

## 1 **Statistical analysis**

2 Statistical analysis was conducted with GraphPad Prism 9 (San Diego, CA, USA). Statistical  
3 outliers were identified with the ROUT method ( $Q = 1$ ) and excluded from the analysis. The  
4 normality of sample distributions was assessed with the Shapiro–Wilk criterion and when  
5 violated non-parametric tests were used. When normally distributed, the data were analyzed  
6 with unpaired t-tests, paired t-tests, one-way ANOVA as appropriate. When normality was  
7 violated, the data were analyzed with Mann–Whitney test. For the analysis of variance with  
8 two factors (two-way ANOVA, RM two-way ANOVA), normality of sample distribution was  
9 assumed, and followed by Bonferroni or Tukey post-hoc test as specified in each figure. Data  
10 are represented as the mean  $\pm$  SEM and the significance was set at 95% of confidence. All the  
11 experimenters were blinded to perform behavioral manual score and analyses.

12

## 13 **Authors Contributions**

14 SM and CB conceived and designed the experiments. SM performed and analyzed all  
15 the behavioural and the electrophysiological experiments. AC implanted mice with canula. JM  
16 and OB generated the OXT-hM4Di mouse line. SM and CB wrote the manuscript and SM  
17 prepared the figures.

18

## 19 **Acknowledgments**

20 CB is supported by the Swiss National Science Foundation, Pierre Mercier Foundation,  
21 ERC consolidator grant and NCCR Synapsy. We thank Lorena Jourdain for technical support.

22

## 23 **Conflict of interests**

24 The authors declare no conflict of interest.

25



## References

1. Pancani, L., Marinucci, M., Aureli, N. & Riva, P. Forced Social Isolation and Mental Health: A Study on 1,006 Italians Under COVID-19 Lockdown. *Frontiers in Psychology* **0**, 1540 (2021).
2. Yamamuro, K. *et al.* A prefrontal–paraventricular thalamus circuit requires juvenile social experience to regulate adult sociability in mice. *Nature Neuroscience* **23:10** **23**, 1240–1252 (2020).
3. Yamamuro, K. *et al.* Social Isolation During the Critical Period Reduces Synaptic and Intrinsic Excitability of a Subtype of Pyramidal Cell in Mouse Prefrontal Cortex. *Cerebral Cortex* **28**, 998–1010 (2018).
4. Makinodan, M., Rosen, K. M., Ito, S. & Corfas, G. A Critical Period for Social Experience–Dependent Oligodendrocyte Maturation and Myelination. *Science* **337**, 1357–1360 (2012).
5. Templer, V. L., Wise, T. B., Dayaw, K. I. T. & Dayaw, J. N. T. Nonsocially housed rats (*Ratus norvegicus*) seek social interactions and social novelty more than socially housed counterparts. *Journal of Comparative Psychology* **132**, 240–252 (2018).
6. Niesink, R. J. M. & van Ree, J. M. Short-term isolation increases social interactions of male rats: A parametric analysis. *Physiology and Behavior* **29**, 819–825 (1982).
7. Gunaydin, L. A. *et al.* Natural neural projection dynamics underlying social behavior. *Cell* **157**, 1535–1551 (2014).
8. Prévost-Solié, C., Girard, B., Righetti, B., Tapparel, M. & Bellone, C. Dopamine neurons of the VTA encode active conspecific interaction and promote social learning through social reward prediction error. *bioRxiv* 2020.05.27.118851 (2020) doi:10.1101/2020.05.27.118851.
9. Tomova, L. *et al.* Acute social isolation evokes midbrain craving responses similar to hunger. *Nature Neuroscience* **23:12** **23**, 1597–1605 (2020).
10. Matthews, G. A. *et al.* Dorsal Raphe Dopamine Neurons Represent the Experience of Social Isolation. *Cell* **164**, 617–631 (2016).
11. Hung, L. W. *et al.* Gating of social reward by oxytocin in the ventral tegmental area. *Science* **357**, 1406–1411 (2017).
12. Tang, Y. *et al.* Oxytocin activation of neurons in ventral tegmental area and interfascicular nucleus of mouse midbrain. *Neuropharmacology* **77**, 277–284 (2014).
13. Xiao, L., Priest, M. F., Nasenbeny, J., Lu, T. & Kozorovitskiy, Y. Biased Oxytocinergic Modulation of Midbrain Dopamine Systems. *Neuron* **95**, 368–384.e5 (2017).
14. Resendez, S. L. *et al.* Social Stimuli Induce Activation of Oxytocin Neurons Within the Paraventricular Nucleus of the Hypothalamus to Promote Social Behavior in Male Mice. *Journal of Neuroscience* **40**, 2282–2295 (2020).
15. Oettl, L. L. *et al.* Oxytocin Enhances Social Recognition by Modulating Cortical Control of Early Olfactory Processing. *Neuron* **90**, 609–621 (2016).
16. Quintana, D. S. & Guastella, A. J. An Allostatic Theory of Oxytocin. *Trends in Cognitive Sciences* **24**, 515–528 (2020).
17. Matthews, G. A. *et al.* Dorsal Raphe Dopamine Neurons Represent the Experience of Social Isolation. *Cell* **164**, 617–631 (2016).
18. Xiao, L., Priest, M. F., Nasenbeny, J., Lu, T. & Kozorovitskiy, Y. Biased Oxytocinergic Modulation of Midbrain Dopamine Systems. *Neuron* **95**, 368–384.e5 (2017).
19. Goel, A. *et al.* Phosphorylation of AMPA Receptors Is Required for Sensory Deprivation-Induced Homeostatic Synaptic Plasticity. *PLOS ONE* **6**, e18264 (2011).

- 1 20. Bariselli, S., Glangetas, C., Tzanoulinou, S. & Bellone, C. Ventral tegmental area  
2 subcircuits process rewarding and aversive experiences. *Journal of Neurochemistry*  
3 **139**, 1071–1080 (2016).
- 4 21. Saal, D., Dong, Y., Bonci, A. & Malenka, R. C. Drugs of Abuse and Stress Trigger a  
5 Common Synaptic Adaptation in Dopamine Neurons. *Neuron* **37**, 577–582 (2003).
- 6 22. Cacioppo, S. Toward a neurology of loneliness. *Psychological Bulletin* **140**, 1464  
7 (2014).
- 8 23. Vanderschuren, L. J. M. J., Niesink, R. J. M. & van Ree, J. M. The neurobiology of  
9 social play behavior in rats. *Neuroscience & Biobehavioral Reviews* **21**, 309–326  
10 (1997).
- 11 24. Baarendse, P. J. J., Counotte, D. S., O'Donnell, P. & Vanderschuren, L. J. M. J. Early  
12 Social Experience Is Critical for the Development of Cognitive Control and Dopamine  
13 Modulation of Prefrontal Cortex Function. *Neuropsychopharmacology* 2013 38:8 **38**,  
14 1485–1494 (2013).
- 15 25. Bariselli, S. *et al.* Role of VTA dopamine neurons and neuroligin 3 in sociability traits  
16 related to nonfamiliar conspecific interaction. *Nature Communications* **9**, 3173 (2018).
- 17 26. Bariselli, S. *et al.* SHANK3 controls maturation of social reward circuits in the VTA.  
18 *Nature Neuroscience* **19**, 926–934 (2016).
- 19 27. Hall, F. S. *et al.* Isolation rearing in rats: Pre- and postsynaptic changes in striatal  
20 dopaminergic systems. *Pharmacology Biochemistry and Behavior* **59**, 859–872 (1998).
- 21 28. Hörnberg, H. *et al.* Rescue of oxytocin response and social behaviour in a mouse  
22 model of autism. *Nature* 2020 584:7820 **584**, 252–256 (2020).
- 23 29. Twomey, E. C., Yelshanskaya, M. v., Vassilevski, A. A. & Sobolevsky, A. I.  
24 Mechanisms of Channel Block in Calcium-Permeable AMPA Receptors. *Neuron* **99**,  
25 956-968.e4 (2018).
- 26 30. Man, H. Y. GluA2-lacking, calcium-permeable AMPA receptors — inducers of  
27 plasticity? *Current Opinion in Neurobiology* **21**, 291–298 (2011).
- 28 31. Bellone, C. & Lüscher, C. Cocaine triggered AMPA receptor redistribution is reversed  
29 in vivo by mGluR-dependent long-term depression. *Nature Neuroscience* 2006 9:5 **9**,  
30 636–641 (2006).
- 31 32. Conrad, K. L. *et al.* Formation of accumbens GluR2-lacking AMPA receptors  
32 mediates incubation of cocaine craving. *Nature* 2008 454:7200 **454**, 118–121 (2008).
- 33 33. Kuniishi, H., Yamada, D., Wada, K., Yamada, M. & Sekiguchi, M. Stress induces  
34 insertion of calcium-permeable AMPA receptors in the OFC–BLA synapse and  
35 modulates emotional behaviours in mice. *Translational Psychiatry* 2020 10:1 **10**, 1–11  
36 (2020).
- 37 34. Yi, E. S., Oh, S., Lee, J. kyu & Leem, Y. H. Chronic stress-induced dendritic  
38 reorganization and abundance of synaptosomal PKA-dependent CP-AMPA receptor in  
39 the basolateral amygdala in a mouse model of depression. *Biochemical and*  
40 *Biophysical Research Communications* **486**, 671–678 (2017).
- 41 35. Mamei, M., Bellone, C., Brown, M. T. C. & Lüscher, C. Cocaine inverts rules for  
42 synaptic plasticity of glutamate transmission in the ventral tegmental area. *Nature*  
43 *Neuroscience* 2011 14:4 **14**, 414–416 (2011).
- 44 36. Garcia-Bereguain, M. A. *et al.* In Vivo Synaptic Scaling Is Mediated by GluA2-  
45 Lacking AMPA Receptors in the Embryonic Spinal Cord. *Journal of Neuroscience* **33**,  
46 6791–6799 (2013).

47

48

**Figure 1**

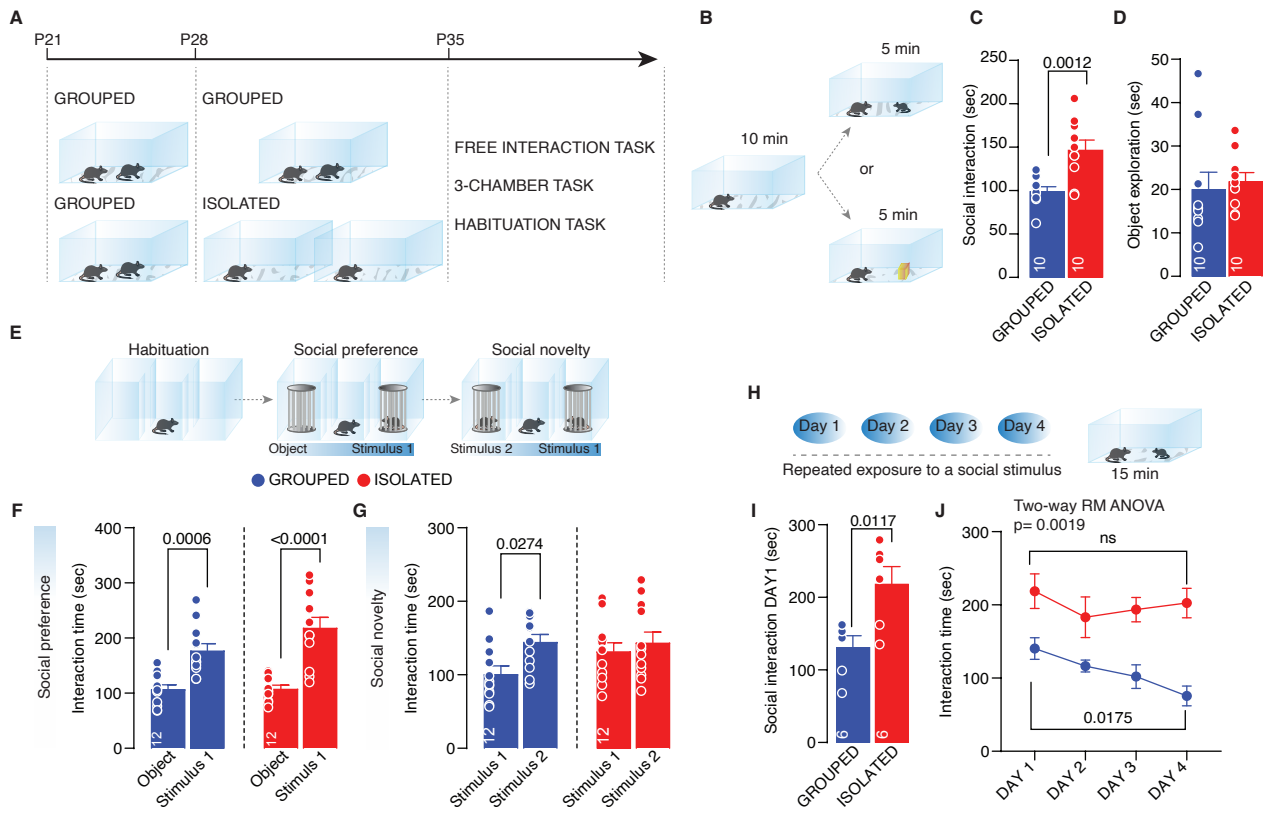

1 **Figure 1: Adolescence acute social isolation induces social craving.**

2 (A) Experimental design: WT mice were isolated between P28 and P35 or kept in group. After  
3 isolation, mice were subjected to different behavioral task. (B) Free direct interaction task  
4 paradigm. (C) Time exploring social stimulus (Unpaired-samples t-test,  $t_{(18)}=3.855$   $p=0.0012$ ,  
5  $n=10$  mice each group). (D) Time exploring object (Mann-Whitney test  $U=33$ ,  $p=0.2176$ ,  $n=10$   
6 mice each group). (E) Three-chamber task experimental paradigm. (F) Interaction time with  
7 object or social stimulus 1 (Two-way ANOVA followed by Bonferroni's multiple comparisons  
8 test: chamber main effect  $F_{(1, 44)}=51.20$ ,  $p<0.0001$ , Grouped  $p=0.0006$ , Isolated  $p<0.0001$ ,  $n=12$   
9 mice each group). (G) Interaction time with stimulus 1 (familiar) and stimulus 2 (unfamiliar)  
10 (Two-way ANOVA followed by Bonferroni's multiple comparisons test: chamber main effect  
11  $F_{(1, 44)}=5.3$ ,  $p=0.0261$ , Grouped  $p=0.0276$ , Isolated  $p=0.9865$ ,  $n=12$  mice each group). (H)  
12 Habituation task paradigm. (I) Interaction time on Day 1 (Unpaired-samples t-test,  $t_{(10)}=3.076$   
13  $p=0.0117$ ,  $n=6$  mice each group).(J) Interaction time across 4 days (Two-way RM ANOVA  
14 followed by Tukey multiple comparisons test, DAY main effect  $F_{(2,027, 20.27)}=4.966$   $p=0.0173$ ,  
15 house condition main effect  $F_{(1, 10)}=17.33$   $p=0.0019$ , Grouped DAY1vsDAY4  $p=0.0226$ ,  
16 Isolated DAY1vsDAY4  $p=0.9094$ ,  $n=6$  mice each group). Data are represented as mean $\pm$ SEM.  
17

Figure 1 - Supplement 1

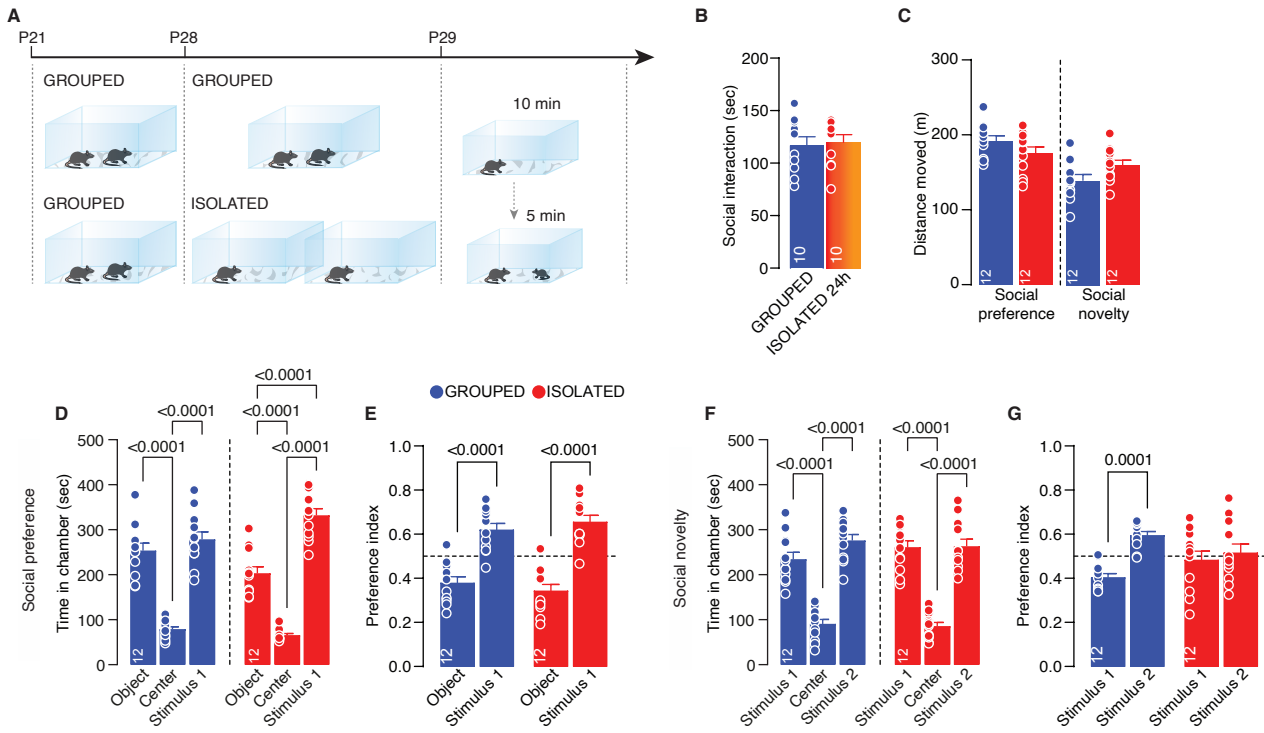

1 **Figure 1 - Supplement 1: Effects of social isolation on social behavior**

2 (A) Experimental design: WT mice were isolated between P28 and P29 or kept in group. After  
3 isolation, mice were subjected to free direct interaction task paradigm. (B) Time exploring  
4 social stimulus (Unpaired-samples t-test,  $t_{(18)}=0.2817$   $p=0.7814$ ,  $n=10$  mice each group). (C)  
5 Distance moved during the 3-chamber task related to figure 1 E-G (Social preference: unpaired  
6 samples t-test  $t_{(22)}=1.537$   $p=0.1386$ . Social novelty: unpaired samples t-test  $t_{(22)}=2.037$   
7  $p=0.0539$ , Grouped  $n=12$ , Isolated  $n=12$ ). (D) Time in chamber during social preference phase  
8 (Two-way ANOVA followed by Tukey multiple comparisons test, chamber main effect  $F_{(2,$   
9  $66)}=162.8$   $p<0.0001$ , Grouped  $n=12$ , Isolated  $n=12$ ). (E) Preference index calculated as object  
10 interaction time/(object+stimulus1) or stimulus1 interaction time/(object+stimulus1) (Two-  
11 way ANOVA followed by Bonferroni multiple comparisons, target main effect  $F_{(1, 44)}=51.20$   
12  $p<0.0001$ , Grouped  $n=12$ , Isolated  $n=12$ ). (F) Time in chamber during social novelty phase  
13 (Two-way ANOVA followed by Tukey multiple comparisons test, chamber main effect  $F_{(2,$   
14  $66)}=112.9$   $p<0.0001$ , Grouped  $n=12$ , Isolated  $n=12$ ). (G) Preference index calculated as  
15 stimulus1 interaction time/(stimulus1+stimulus2) or stimulus2 interaction  
16 time/(stimulus1+stimulus2) (Two-way ANOVA followed by Bonferroni multiple  
17 comparisons, target main effect  $F_{(1, 44)}=13.63$   $p=0.0006$ , Grouped  $n=12$ , Isolated  $n=12$ ). Data  
18 are represented as mean $\pm$ SEM.  
19



Figure 1 - Supplement 2

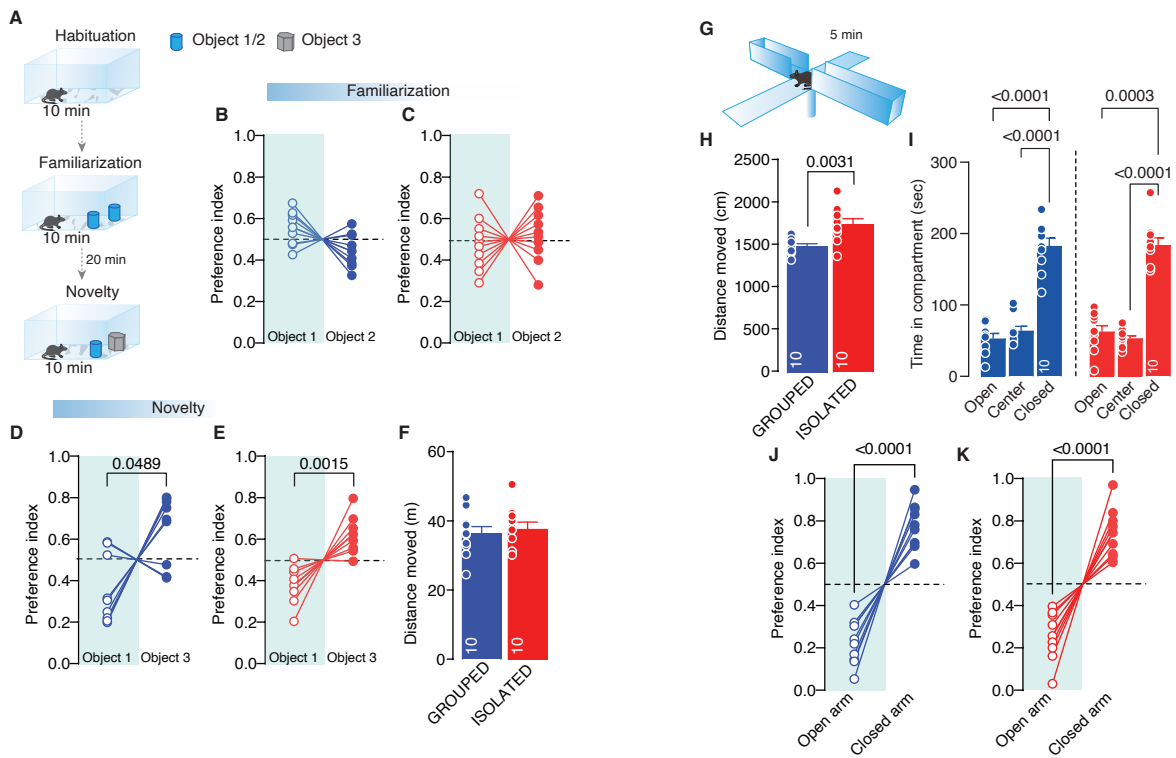

1 **Figure 1 - Supplement 2: Effects of social isolation on social behavior**

2 (A) Novel object recognition task experimental paradigm. (B-C) Preference index during  
3 familiarization phase calculated as object1 interaction time/(object1+object2) or object2  
4 interaction time/(object1+object2) (Grouped: Paired-samples t-test  $t_{(9)}=2.181$   $p=0.0571$   $n=10$ ,  
5 Isolated: Paired-samples t-test  $t_{(9)}=0.5301$   $p=0.6088$   $n=10$ ). (D-E) Preference index during  
6 novelty phase calculated as object1 interaction time/(object1+object3) or object3 interaction  
7 time/(object1+object3) (Grouped: Paired-samples t-test  $t_{(9)}=2.276$   $p=0.0489$   $n=10$ , Isolated:  
8 Paired-samples t-test  $t_{(9)}=4.487$   $p=0.0015$   $n=10$ ). (F) Distance moved (Unpaired sample t-test  
9  $t_{(18)}=0.4078$   $p=0.6434$ , Grouped  $n=10$ , Isolated  $n=10$ ). (G) Elevated Plus Maze experimental  
10 paradigm. (H) Distance moved (Unpaired sample t-test  $t_{(18)}=3.419$   $p=0.0031$ , Grouped  $n=10$ ,  
11 Isolated  $n=10$ ). (I) Time spent in compartment (Two-way ANOVA followed Tukey multiple  
12 comparisons test, compartment main effect  $F_{(1,280, 23,04)}=106.0$   $p<0.0001$ , Grouped  $n=10$ ,  
13 Isolated  $n=10$ ). (J-K) Preference index calculated as time in open arm/(open+close) or time in  
14 close arm/(open+close) (Grouped: Paired-samples t-test  $t_{(9)}=8.101$   $p<0.0001$   $n=10$ , Isolated:  
15 Paired-samples t-test  $t_{(9)}=7.025$   $p<0.0001$   $n=10$ ). Data are represented as mean $\pm$ SEM.

16

**Figure 1 - Supplement 3**

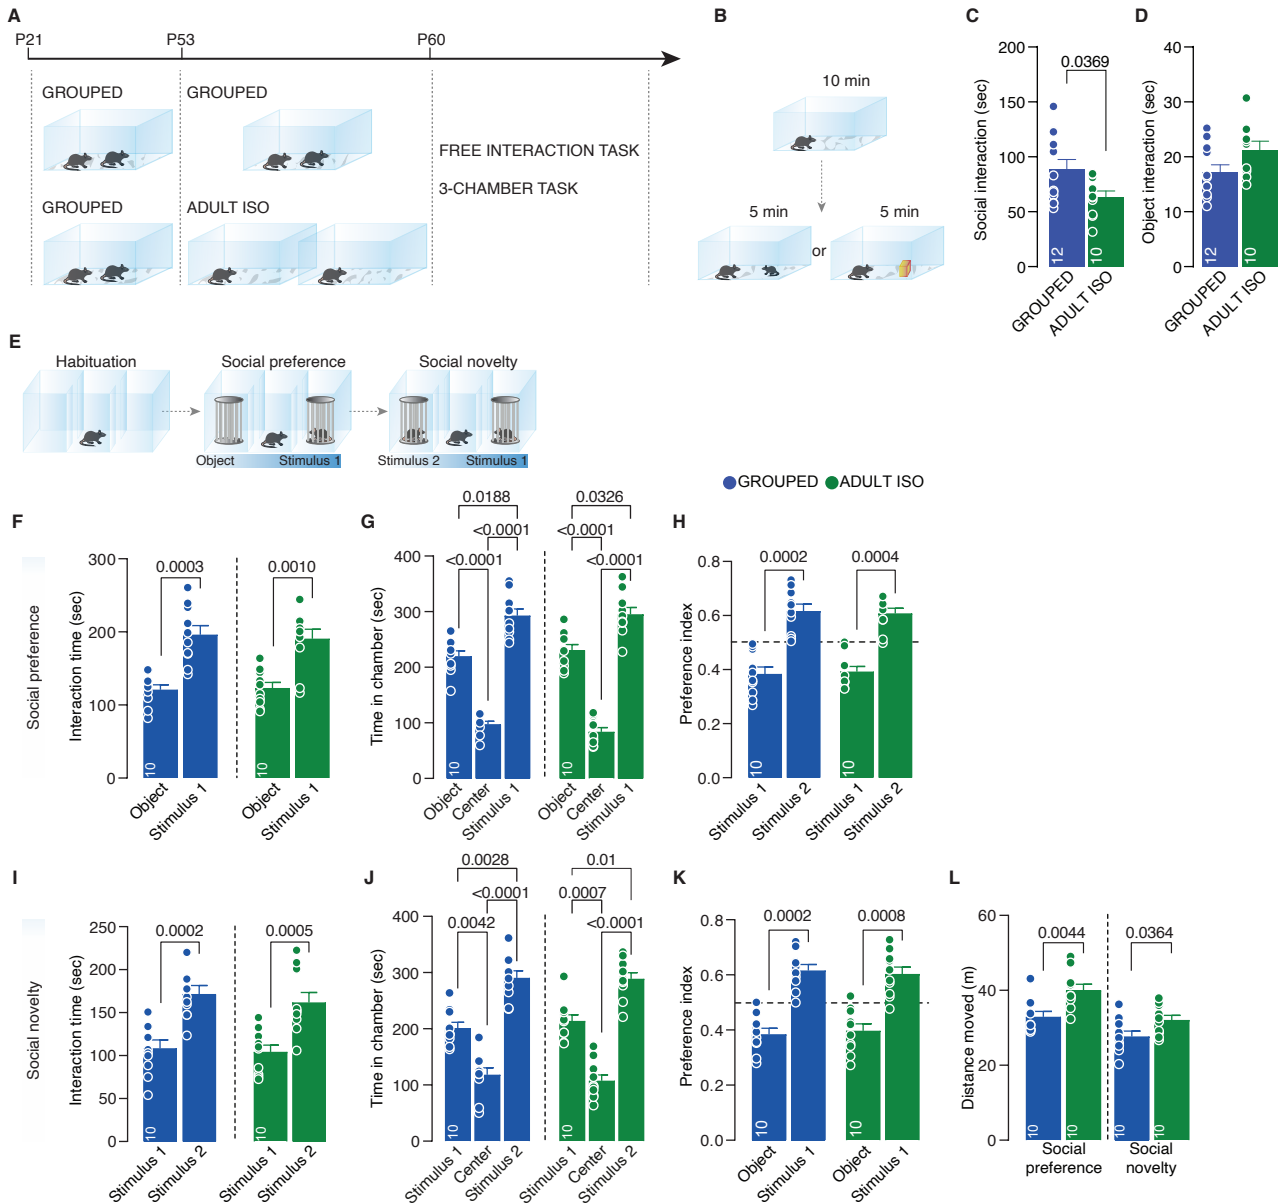

1 **Figure 1 - Supplementary Figure 3: Effects of social isolation during adulthood**

2 (A) Experimental design: WT mice were isolated between P53 and P60 or kept in group. After  
3 isolation, mice were subjected to different behavioral task. (B) Free direct interaction task  
4 paradigm. (C) Time exploring social stimulus (Unpaired-samples t-test,  $t_{(20)}=2.237$   $p=0.0369$ ,  
5 Grouped  $n=12$ , Isolated  $n=10$ ). (D) Time exploring object (Unpaired-samples t-test,  $t_{(19)}=1.876$   
6  $p=0.0761$ , Grouped  $n=12$ , Isolated  $n=9$ ). (E) Three-chamber task experimental paradigm. (F)  
7 Interaction time with object or social stimulus 1 (Two-way ANOVA followed by Bonferroni's  
8 multiple comparisons test: chamber main effect  $F_{(1, 18)}=40.32$ ,  $p<0.0001$ , Grouped  $p=0.0003$ ,  
9 Isolated  $p=0.001$ ,  $n=10$  mice each group). (G) Time in chamber during social preference phase  
10 (Two-way ANOVA followed by Tukey multiple comparisons test, chamber main effect  $F_{(1.441,$   
11  $25.94)}=146.8$   $p<0.0001$ , Grouped  $n=12$ , Isolated  $n=12$ ). (H) Preference index calculated as object  
12 interaction time/(object+stimulus1) or stimulus1 interaction time/(object+stimulus1) (Two-  
13 way ANOVA followed by Bonferroni multiple comparisons, target main effect  $F_{(1, 18)}=42.46$   
14  $p<0.0001$ ,  $n=10$  mice each group). (I) Interaction time with stimulus 1 (familiar) and stimulus  
15 2 (unfamiliar) (Two-way ANOVA followed by Bonferroni's multiple comparisons test:  
16 chamber main effect  $F_{(1, 18)}=46.45$ ,  $p<0.0001$ , Grouped  $p=0.0002$ , Isolated  $p=0.0005$ ,  $n=10$   
17 mice each group). (J) Time in chamber during social novelty phase (Two-way ANOVA  
18 followed by Tukey multiple comparisons test, chamber main effect  $F_{(1.962, 35.31)}=81.61$   
19  $p<0.0001$ ,  $n=10$  mice each group). (K) Preference index calculated as stimulus1 interaction  
20 time/(stimulus1+stimulus2) or stimulus2 interaction time/(stimulus1+stimulus2) (Two-way  
21 ANOVA followed by Bonferroni multiple comparisons, target main effect  $F_{(1,18)}=47.63$   
22  $p<0.0001$ ,  $n=10$  mice each group). (L) Distance moved during the 3-chamber task (Social  
23 preference: Unpaired samples t-test  $t_{(18)}=3.257$   $p=0.0044$ . Social novelty: Unpaired samples t-  
24 test  $t_{(18)}=2.26$   $p=0.0364$ ,  $n=10$  mice each group). Data are represented as mean $\pm$ SEM.

25

**Figure 2**

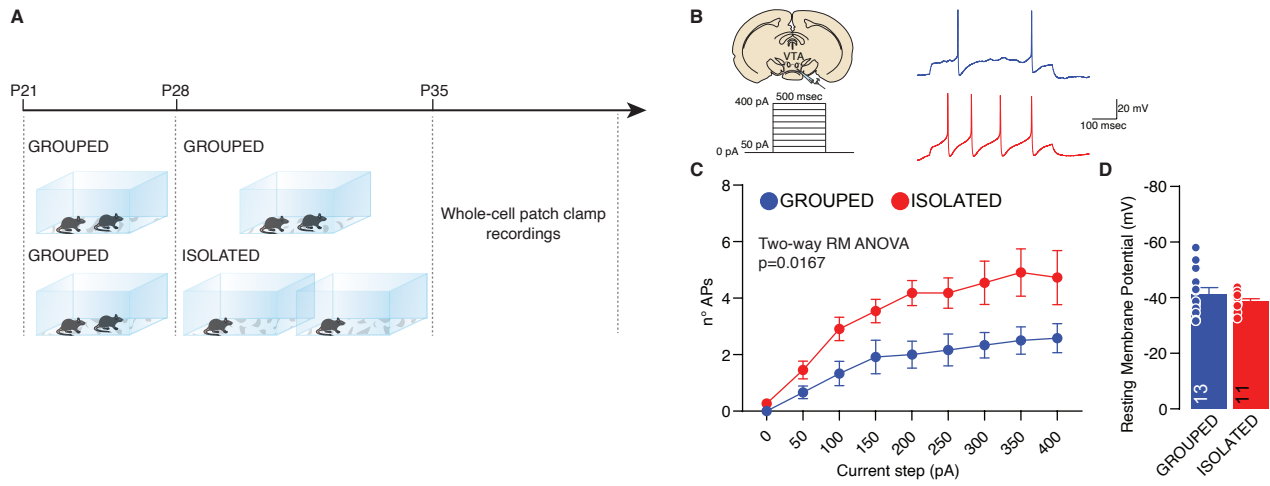

1 **Figure 2: Adolescence acute social isolation induces VTA DA neurons hyperexcitability**

2 (A) Experimental design: WT mice were isolated between P28 and P35 or kept in group. After  
3 isolation, mice were subjected whole-cell patch clamp recordings. (B) Left: experimental  
4 paradigm, VTA DA neurons were subjected at multiple depolarizing current steps. Right:  
5 example traces from 250pA depolarizing current injection. (C) Number of action potentials  
6 (APs) across increasing depolarizing current steps (Two-way RM ANOVA, house condition  
7 main effect  $F_{(1, 22)}=6.705$ ,  $p=0.0167$ ). (D) Resting membrane potential of recorded cells  
8 (Unpaired samples t-test,  $t_{(22)}=0.9268$ ,  $p=0.3641$ . Grouped  $n=13$ , Isolated  $n=11$  from 3 mice  
9 each group). Data are represented as mean $\pm$ SEM.

10



**Figure 3**

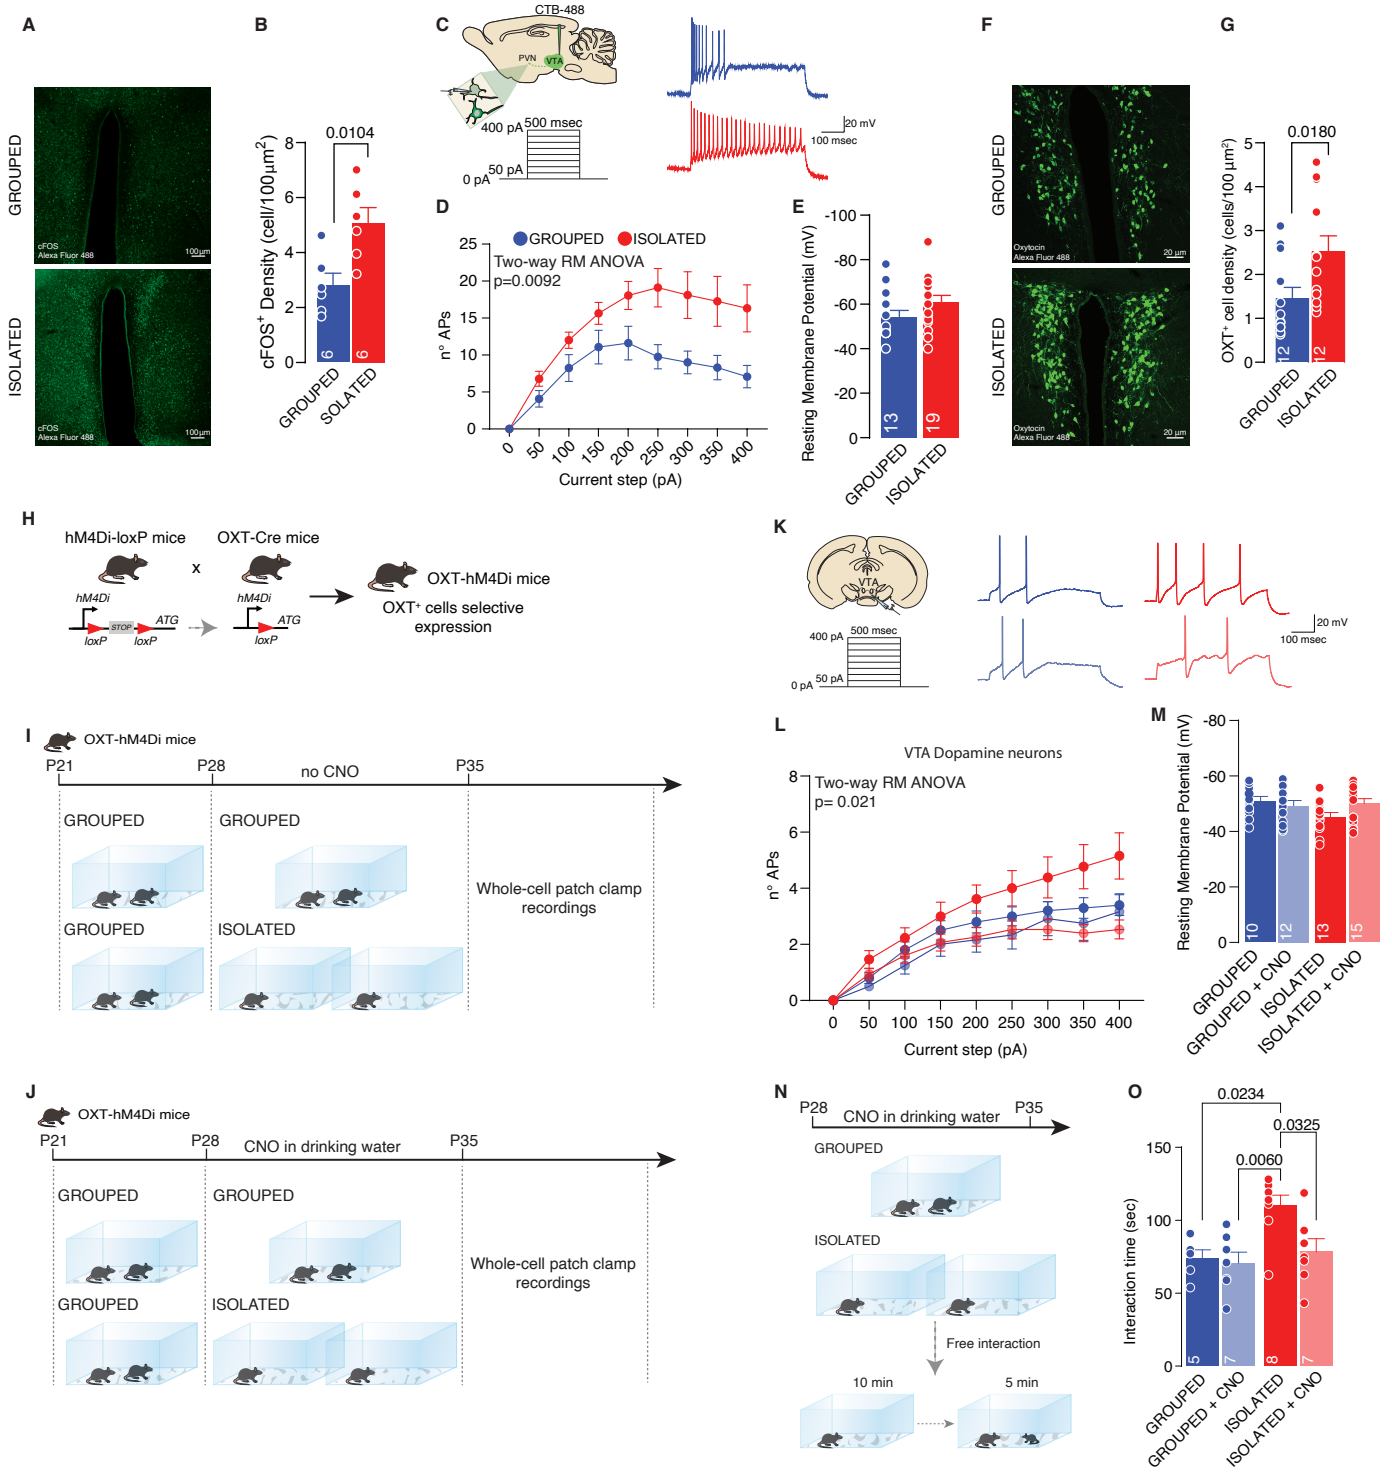

1 **Figure 3: PVN OXT neurons as main orchestrator of social isolation induced social**  
2 **craving.**

3 (A) Representative confocal images of PVN stained with cFOS antibody (scale bar 100 $\mu$ m).  
4 (B) cFos+ cells density (Unpaired samples t-test,  $t_{(10)}=3.146$ ,  $p=0.0104$ ,  $n=6$  slices from 3  
5 mouse each group). (C) Left: experimental paradigm, PVN neurons projecting to VTA (CTB-  
6 488 was injected in the VTA at P21) were subjected at multiple depolarizing current steps.  
7 Right: example traces from 250pA depolarizing current injection. (D) Number of action  
8 potentials (APs) across increasing depolarizing current steps (Two-way RM ANOVA, house  
9 condition main effect  $F_{(1, 30)}=7.709$ ,  $p=0.0092$ ). (E) Resting membrane potential of recorded  
10 cells (Unpaired samples t-test,  $t_{(30)}=1.524$ ,  $p=0.1381$ . Grouped  $n=13$ , Isolated  $n=19$  from 3 mice  
11 each group). (F) Representative confocal images of PVN stained with OXT antibody (scale bar  
12 20 $\mu$ m). (G) OXT+ cells density (Mann-Whitney  $U=31.50$ ,  $p=0.018$ ,  $n=12$  slices from 3 mouse  
13 each group). (H) Experimental design. hM4Di-loxP mice were crossed with OXT-cre mice  
14 generating OXT-hM4Di mice which express inhibitory DREADD specifically in OXT  
15 neurons. (I-J) Experimental paradigm: OXT-hM4Di mice were isolated between P28 and P35  
16 and CNO was dissolved in the drinking water. After isolation mice were subjected whole-cell  
17 patch clamp recordings. (K) Left: experimental paradigm, VTA DA neurons were subjected at  
18 multiple depolarizing current steps. Right: example traces from 250pA depolarizing current  
19 injection. (L) Number of action potentials (APs) across increasing depolarizing current steps  
20 (Two-way RM ANOVA, house condition main effect  $F_{(1, 26)}=6.053$ ,  $p=0.021$ ). (M) Resting  
21 membrane potential of recorded cells (Two-way ANOVA, CNO main effect  $F_{(1, 47)}=1.261$ ,  
22  $p=0.2673$ ; house condition main effect  $F_{(1, 47)}=1.4$ ,  $p=0.2427$  Grouped  $n=10$ , Grouped+CNO  
23  $n=12$ , Isolated  $n=13$ , Isolated+CNO  $n=15$  from 3 mice each group). (N) Experimental design.  
24 OXT-hM4Di mice were isolated or kept grouped from P28 to P35. CNO was dissolved in  
25 drinking water and after isolation mice underwent to free direct social interaction task. (O)  
26 Social interaction time (Two-way ANOVA followed by Tukey multiple comparisons test,  
27 house condition main effect  $F_{(1, 23)}=7.612$ ,  $p=0.0112$ , CNO main effect  $F_{(1, 23)}=4.597$ ,  
28  $p=0.0428$ ). Data are represented as mean $\pm$ SEM.

29

### Figure 3 - Supplement 1

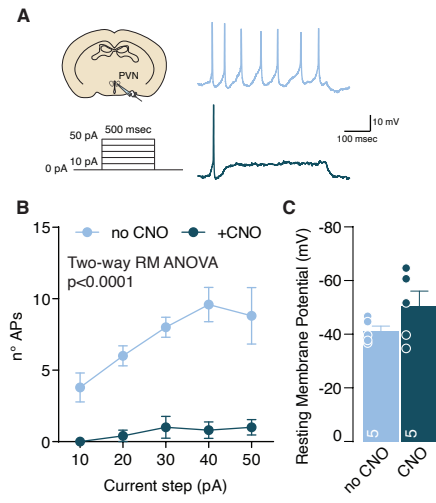

1 **Figure 3 - Supplement 1: CNO validation**

2 (A) Left: experimental paradigm, OXT neurons from OTX-hM4Di mice were subjected at  
3 multiple depolarizing current steps in absence or presence of CNO 10 $\mu$ M in the recording  
4 chamber. Right: example traces from 30pA depolarizing current injection. (B) Number of  
5 action potentials (APs) across increasing depolarizing current steps (Two-way RM ANOVA,  
6 CNO main effect  $F_{(1, 8)}=90.15$ ,  $p<0.0001$ ). (C) Resting membrane potential of recorded cells  
7 (Unpaired samples t-test,  $t_{(8)}=1.502$ ,  $p=0.1715$ ,  $n=5$  from 1 mouse). Data are represented as  
8 mean $\pm$ SEM.

9

**Figure 4**

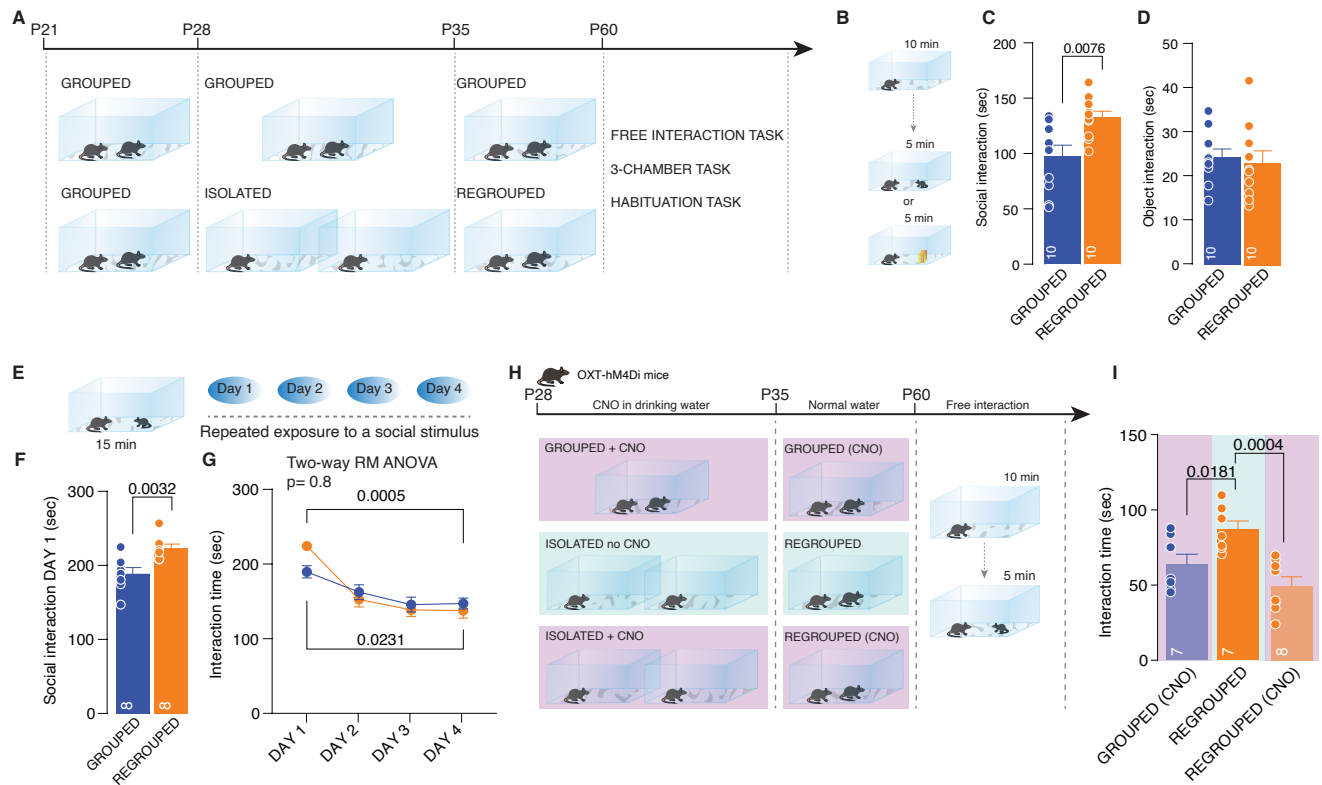

1 **Figure 4: Long-lasting effects of adolescence acute social isolation**

2 (A) Experimental design: WT mice were isolated between P28 and P35 and regrouped until P60  
3 or always kept in group. Mice were subjected to different behavioral task. (B) Free direct  
4 interaction task paradigm. (C) Time exploring social stimulus (Unpaired-samples t-test,  
5  $t_{(18)}=3.004$   $p=0.0076$ ,  $n=10$  mice each group). (D) Time exploring object (Unpaired-samples t-  
6 test,  $t_{(18)}=3.3717$   $p=0.7144$ ,  $n=10$  mice each group). (E) Habituation task paradigm. (F)  
7 Interaction time on Day 1 (Unpaired-samples t-test,  $t_{(14)}=3.553$   $p=0.0032$ ,  $n=8$  mice each  
8 group). (G) Interaction time across 4 days (Two-way RM ANOVA followed by Tukey multiple  
9 comparisons test, DAY main effect  $F_{(2,78)}=35.12$ ,  $p<0.0001$ , house condition main effect  
10  $F_{(1,14)}=0.05929$ ,  $p=0.8112$ , Grouped DAY1vsDAY4  $p=0.0231$ , Isolated DAY1vsDAY4  
11  $p=0.0005$ ,  $n=8$  mice each group). (H) Experimental design. OXT-hM4Di mice were isolated  
12 from P28 to P35 and regrouped until P60 or kept always grouped. CNO was dissolved in  
13 drinking water and administered during social isolation. At P60 mice underwent to free direct  
14 social interaction task. (I) Social interaction time (One-way ANOVA followed by Tukey  
15 multiple comparisons test,  $F_{(2,19)}=9.430$ ,  $p=0.0014$ , Grouped(CNO)  $n=7$ , Regrouped  $n=7$ ,  
16 Regrouped(CNO)  $n=8$ ). Data are represented as mean $\pm$ SEM.

17

Figure 4 - Supplement 1

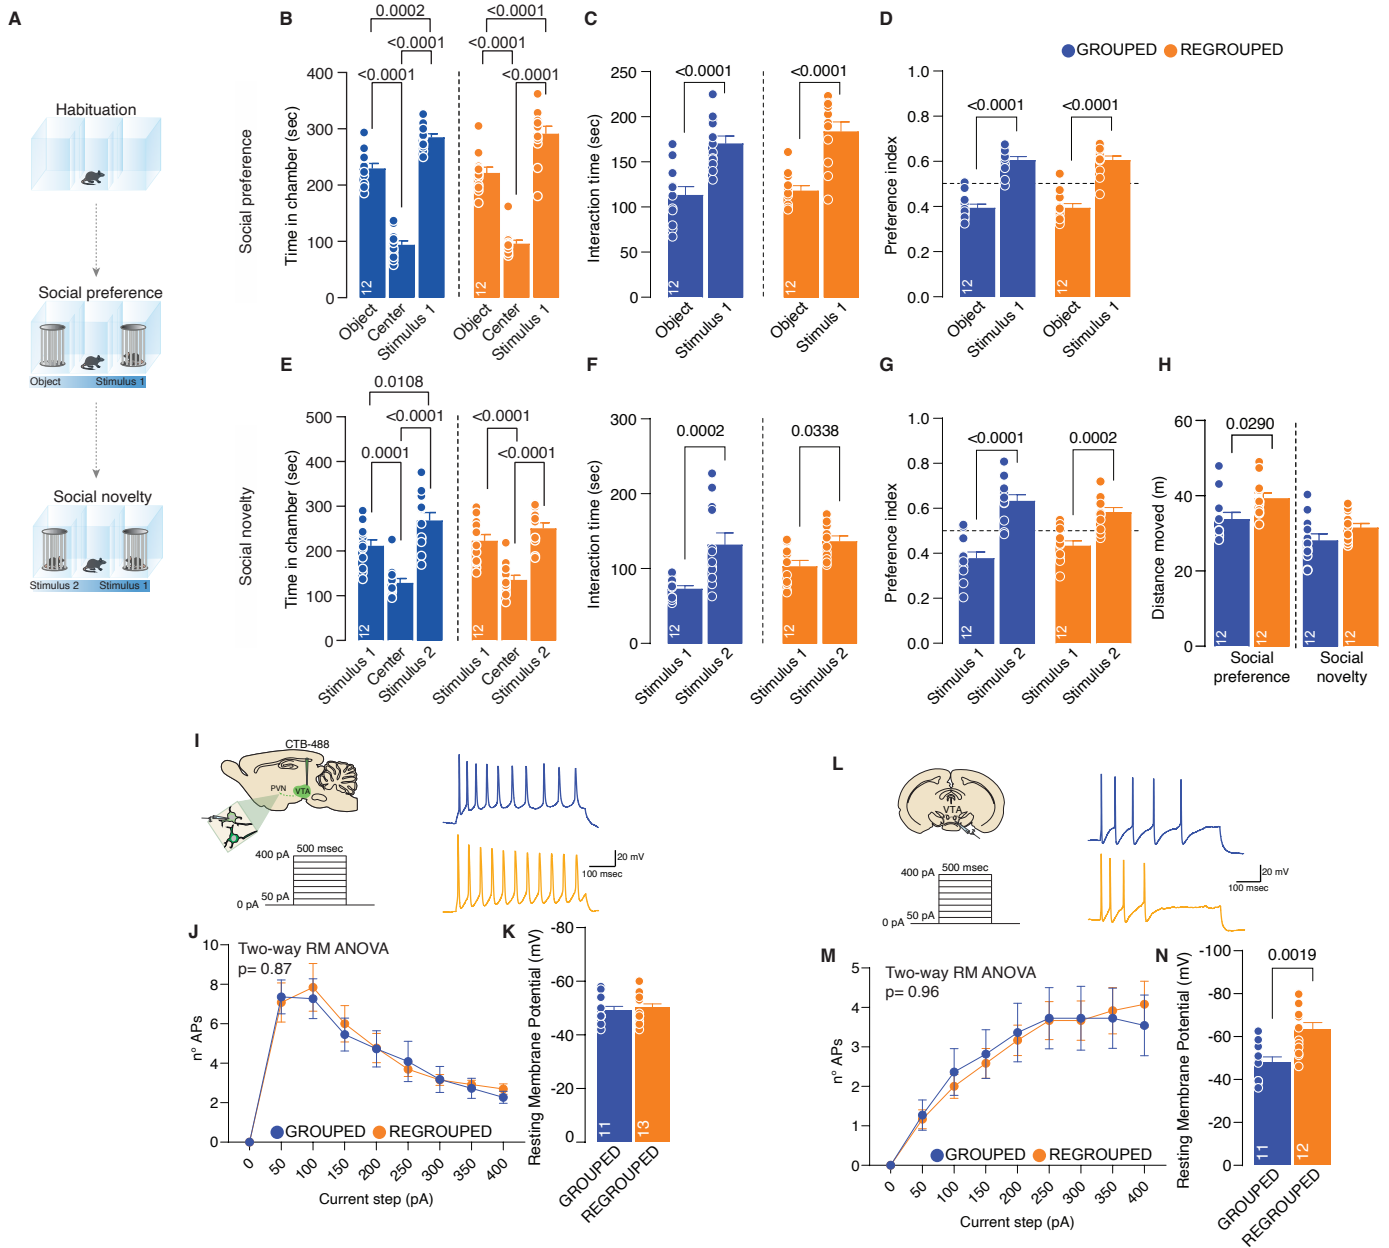



1 **Figure 4 - Supplement 1: Long-lasting effects of acute social isolation in adolescence**

2 (A) Three-chamber task experimental paradigm. (B) Time in chamber during social preference  
3 phase (Two-way ANOVA followed by Tukey multiple comparisons test, chamber main effect  
4  $F_{(2, 66)}=230.1$   $p<0.0001$ , Grouped  $n=12$ , Isolated  $n=12$ ). (C) Interaction time with object or  
5 social stimulus 1 (Two-way ANOVA followed by Bonferroni's multiple comparisons test:  
6 chamber main effect  $F_{(1, 44)}=52.27$ ,  $p<0.0001$ , Grouped  $p<0.0001$ , Isolated  $p<0.0001$ ,  $n=12$   
7 mice each group). (D) Preference index calculated as object interaction  
8 time/(object+stimulus1) or stimulus1 interaction time/(object+stimulus1) (Two-way ANOVA  
9 followed by Bonferroni multiple comparisons, target main effect  $F_{(1, 44)}=149.1$   $p<0.0001$ ,  $n=12$   
10 mice each group). (E) Time in chamber during social novelty phase (Two-way ANOVA  
11 followed by Tukey multiple comparisons test, chamber main effect  $F_{(2, 66)}=47.11$   $p<0.0001$ ,  
12  $n=12$  mice each group). (F) Interaction time with stimulus 1 (familiar) and stimulus 2  
13 (unfamiliar) (Two-way ANOVA followed by Bonferroni's multiple comparisons test: chamber  
14 main effect  $F_{(1, 44)}=23.32$ ,  $p<0.0001$ , Grouped  $p=0.0002$ , Isolated  $p=0.0338$ ,  $n=12$  mice each  
15 group). (G) Preference index calculated as stimulus1 interaction time/(stimulus1+stimulus2)  
16 or stimulus2 interaction time/(stimulus1+stimulus2) (Two-way ANOVA followed by  
17 Bonferroni multiple comparisons, target main effect  $F_{(1,44)}=68.21$   $p<0.0001$ ,  $n=12$  mice each  
18 group). (H) Distance moved during the 3-chamber (Social preference: Unpaired samples t-test  
19  $t_{(22)}=2.424$   $p=0.024$ . Social novelty: Unpaired samples t-test  $t_{(22)}=1.658$   $p=0.115$ ,  $n=12$  mice  
20 each group). (I) Left: experimental paradigm, PVN neurons were subjected at multiple  
21 depolarizing current steps. Right: example traces from 250pA depolarizing current injection.  
22 (J) Number of action potentials (APs) across increasing depolarizing current steps (Two-way  
23 RM ANOVA, house condition main effect  $F_{(1, 22)}=0.02815$ ,  $p=0.8683$ ). (K) Resting membrane  
24 potential of recorded cells (Unpaired samples t-test,  $t_{(22)}=0.4549$ ,  $p=0.6536$ . Grouped  $n=11$ ,  
25 Isolated  $n=13$  from 3 mice each group). (L) Left: experimental paradigm, VTA DA neurons  
26 were subjected at multiple depolarizing current steps. Right: example traces from 250pA  
27 depolarizing current injection. (M) Number of action potentials (APs) across increasing  
28 depolarizing current steps (Two-way RM ANOVA, house condition main effect  $F_{(1,$   
29  $21)}=0.002424$ ,  $p=0.9612$ ). (N) Resting membrane potential of recorded cells (Unpaired samples  
30 t-test,  $t_{(21)}=3.538$ ,  $p=0.0019$ . Grouped  $n=11$ , Isolated  $n=12$  from 3 mice each group). Data are  
31 represented as mean $\pm$ SEM.

32

**Figure 5**

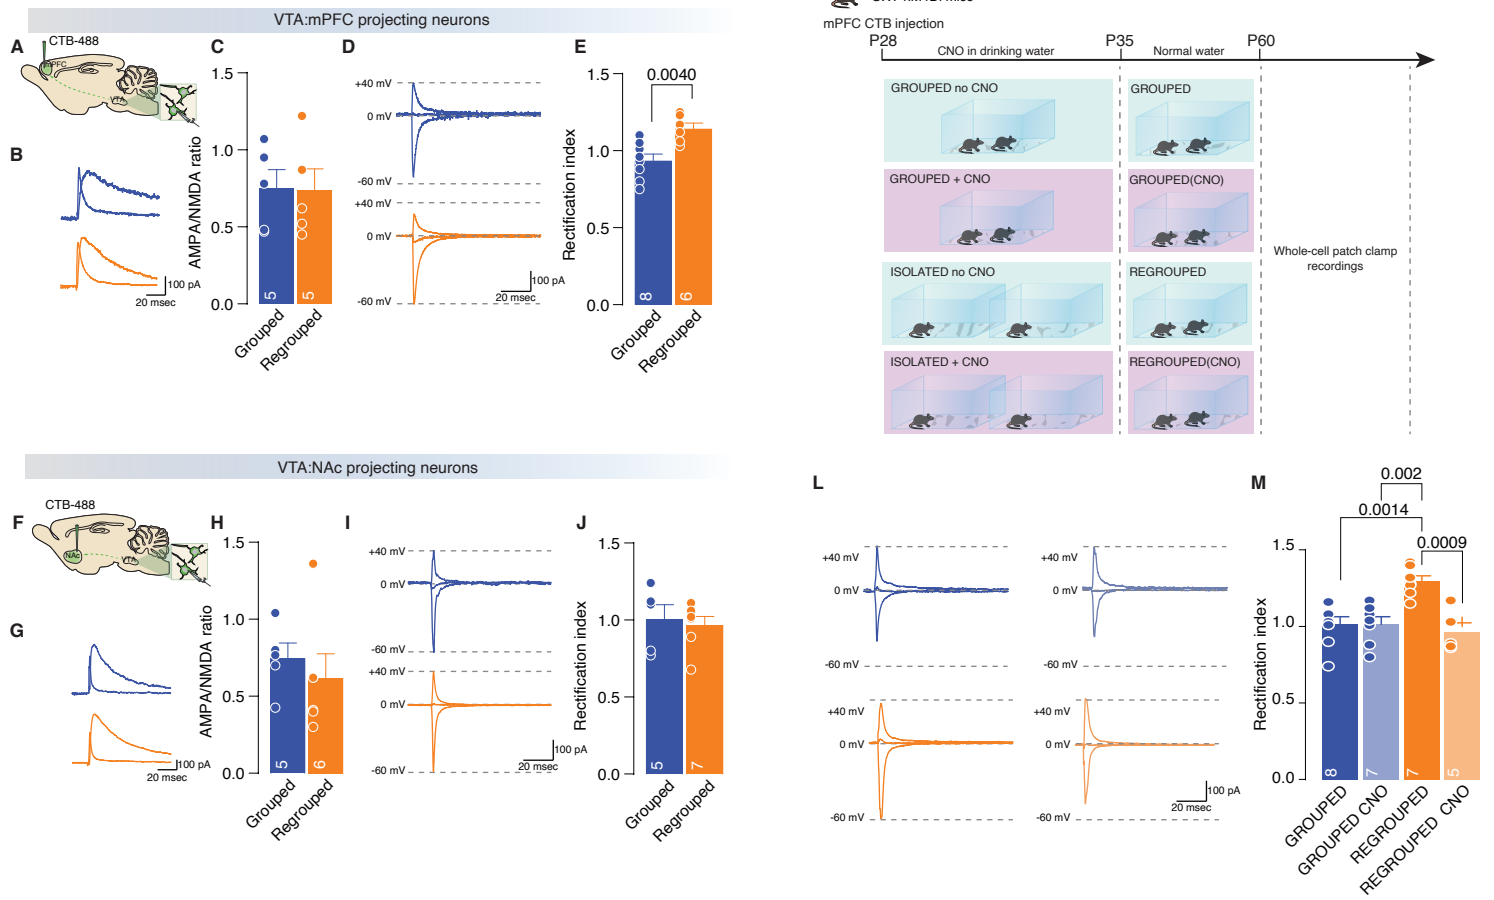

1 **Figure 5: Adolescence acute social isolation induces synaptic scaling in adulthood mice.**

2 (A,F) Experimental paradigm. WT mice were isolated between P28 and P35. Then mice were  
3 regrouped, injected with 488-CTB in the mPFC (A) or NAc (F) between P45-50 and at P60  
4 were subjected at whole-cell patch clamp recording. (B) Example traces of isolated AMPA  
5 and NMDA currents recorded at +40mV. (C) AMPA-NMDA ratio of VTA-DA:mPFC  
6 projecting neurons (Unpaired samples t-test,  $t_{(8)}=0.07544$ ,  $p=0.9417$ , Grouped  $n=5$ , Isolated  
7  $n=5$  from 2 mice each group). (D) Example traces of Isolated AMPA current recorded at +40,  
8 0 and -60 mV. (E) Rectification index of VTA-DA:mPFC projecting neurons (Unpaired  
9 samples t-test,  $t_{(12)}=3.545$ ,  $p=0.004$ , Grouped  $n=8$ , Isolated  $n=8$  from 2 mice each group). (G)  
10 Example traces of isolated AMPA and NMDA currents recorded at +40mV. (H) AMPA-  
11 NMDA ratio of VTA-DA:NAc projecting neurons (Unpaired samples t-test,  $t_{(9)}=0.6553$ ,  
12  $p=0.5287$ , Grouped  $n=5$ , Isolated  $n=6$  from 2 mice each group). (I) Example traces of Isolated  
13 AMPA current recorded at +40, 0 and -60 mV. (J) Rectification index of VTA-DA:NAc  
14 projecting neurons (Unpaired samples t-test,  $t_{(10)}=0.3720$ ,  $p=0.7176$ , Grouped  $n=5$ , Isolated  
15  $n=7$  from 2 mice each group). (K) Experimental paradigm: OXT-hM4Di mice were injected  
16 with CTB in the mPFC and isolated between P28 and P35 or kept always grouped and CNO  
17 was dissolved in drinking water. Then mice were regrouped until P60 and subsequently were  
18 subjected at whole-cell patch clamp recording. (L) Example traces of isolated AMPA current  
19 recorded at +40, 0 and -60 mV. (M) Rectification index of VTA-DA:mPFC projecting neurons  
20 (Two-way ANOVA followed by Tukey multiple comparisons test, house condition main effect  
21  $F_{(1,23)}=5.459$   $p=0.0285$ , CNO main effect  $F_{(1,23)}=11.19$   $p=0.0028$ , Grouped  $n=8$ , Grouped CNO  
22  $n=7$ , Regrouped  $n=7$ , Regrouped CNO  $n=5$  from 2 mice each group). Data are represented as  
23 mean±SEM.

24

**Figure 6**

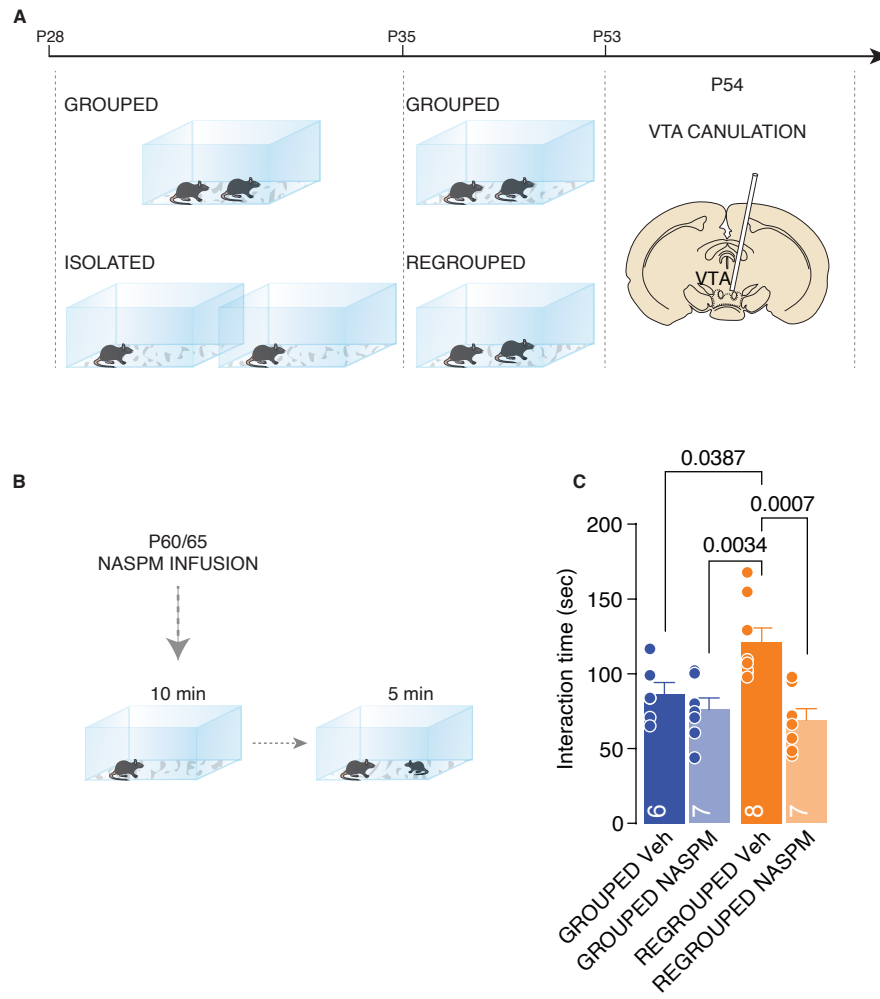

1 **Figure 6: CP-AMPARs are responsible of increased social interaction during adulthood**  
2 (A) Experimental paradigm: WT mice were isolated between P28 and P35. Then mice were  
3 regrouped until P53 and cannulated over the VTA. (B) Mice underwent to direct free interaction  
4 task after infusion of CP-AMPARs antagonist NASPM. (C) Social interaction time (Two-way  
5 ANOVA followed by Tukey multiple comparisons test, NASPM main effect  $F_{(1, 24)}=13.78$   
6  $p=0.0011$ , Grouped Veh  $n=6$ , Grouped NASPM  $n=7$ , Regrouped Veh  $n=8$ , Regrouped NASPM  
7  $n=7$ ). Data are represented as mean $\pm$ SEM.
